# Supplementary material
Source: ML conference proceedings conference paper supplement (https://openreview.net/forum?id=HrRKc9ei7h)

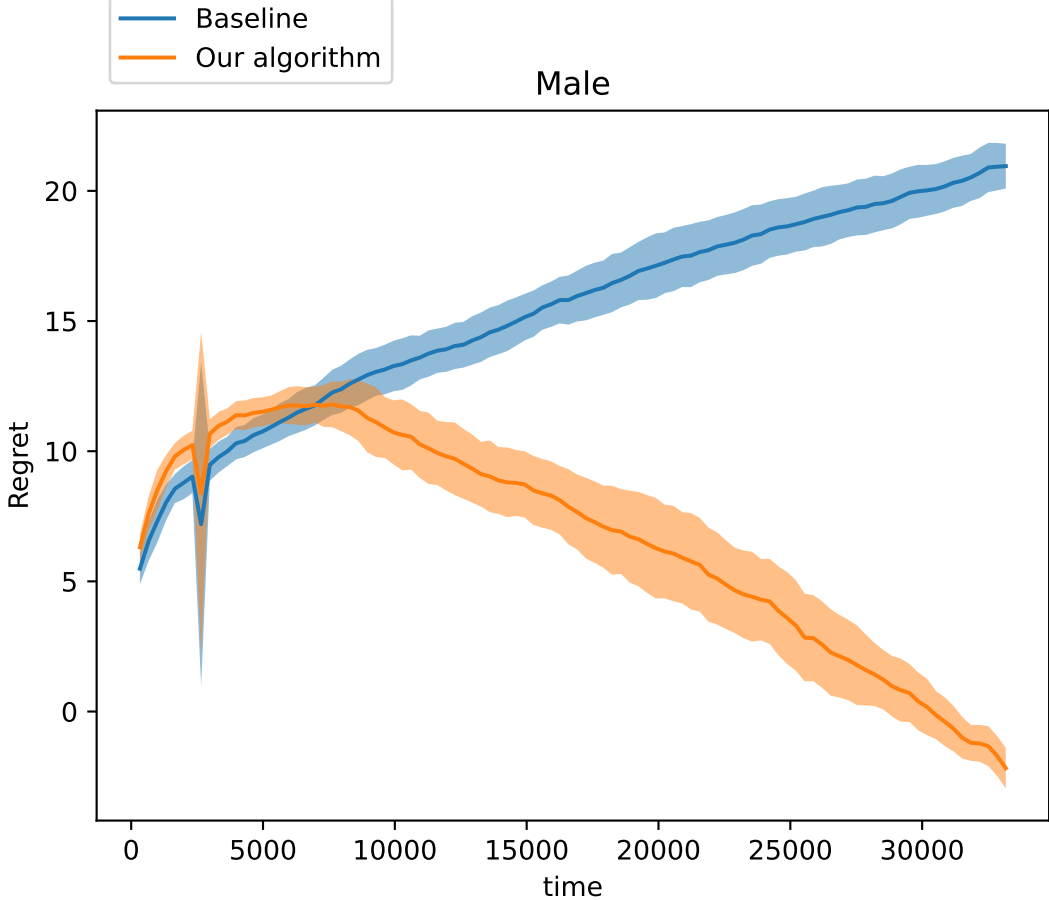

Supplement: supplementary_material [file attachment]

triangle

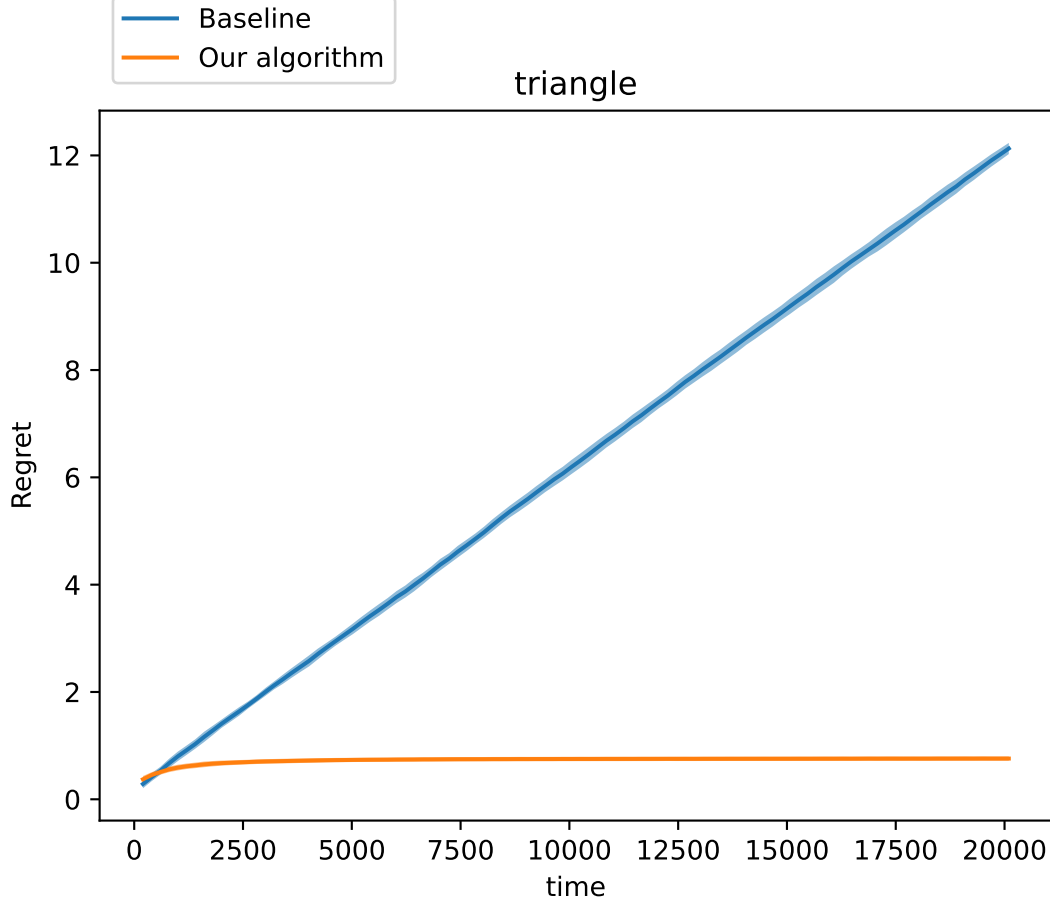

Supplement: supplementary_material [file attachment]

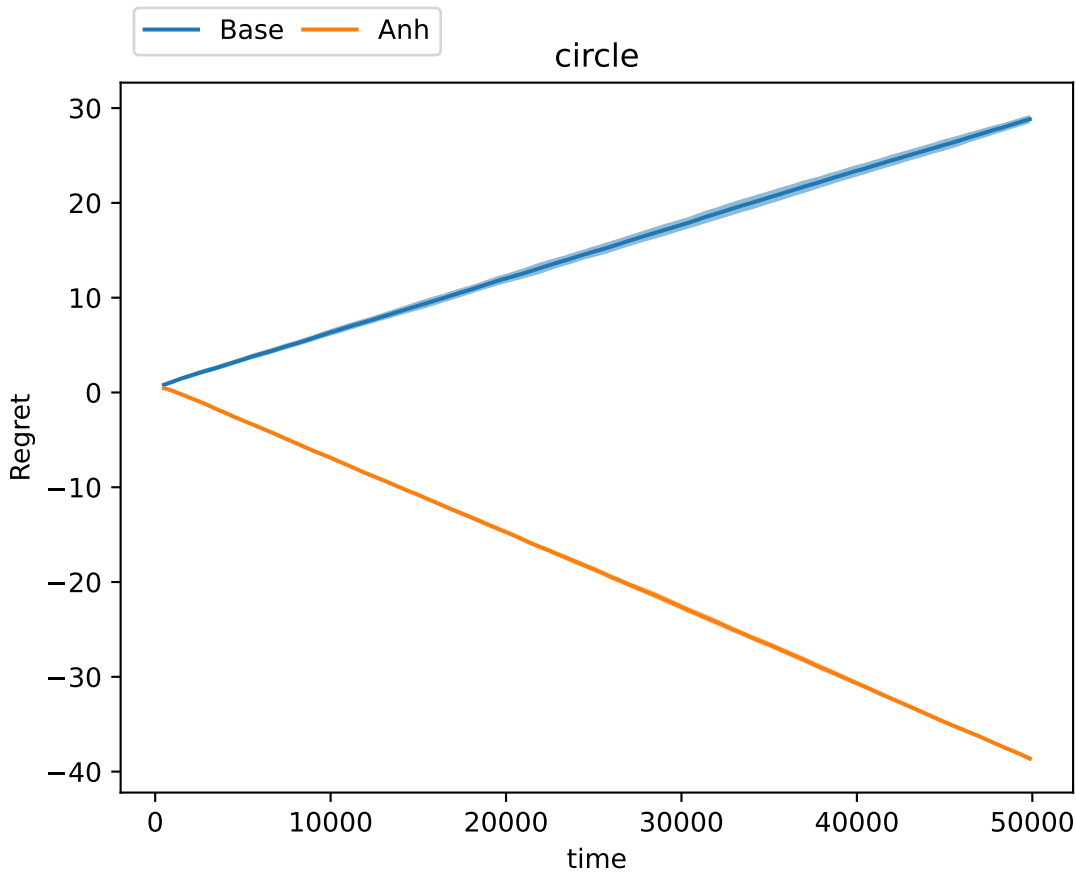

Supplement: supplementary_material [file attachment]

## College&more

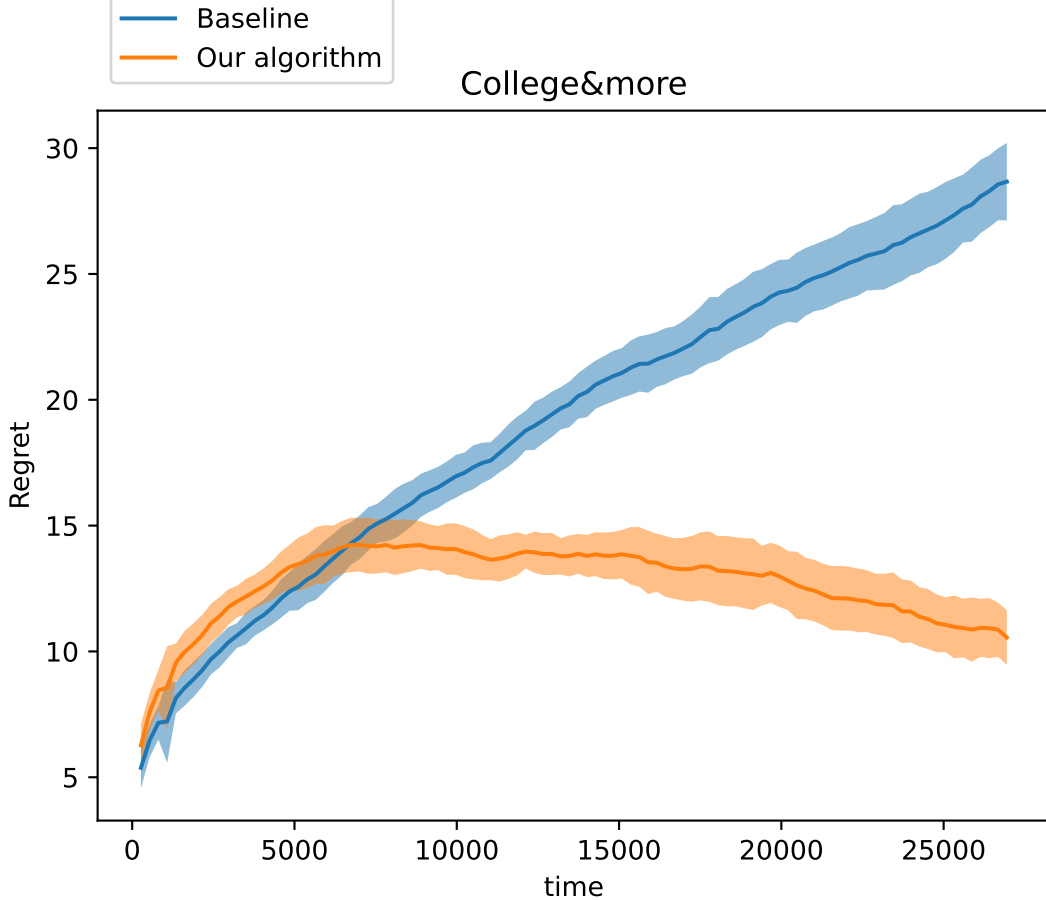

Supplement: supplementary_material [file attachment]

# Amer-Indian-Eskimo

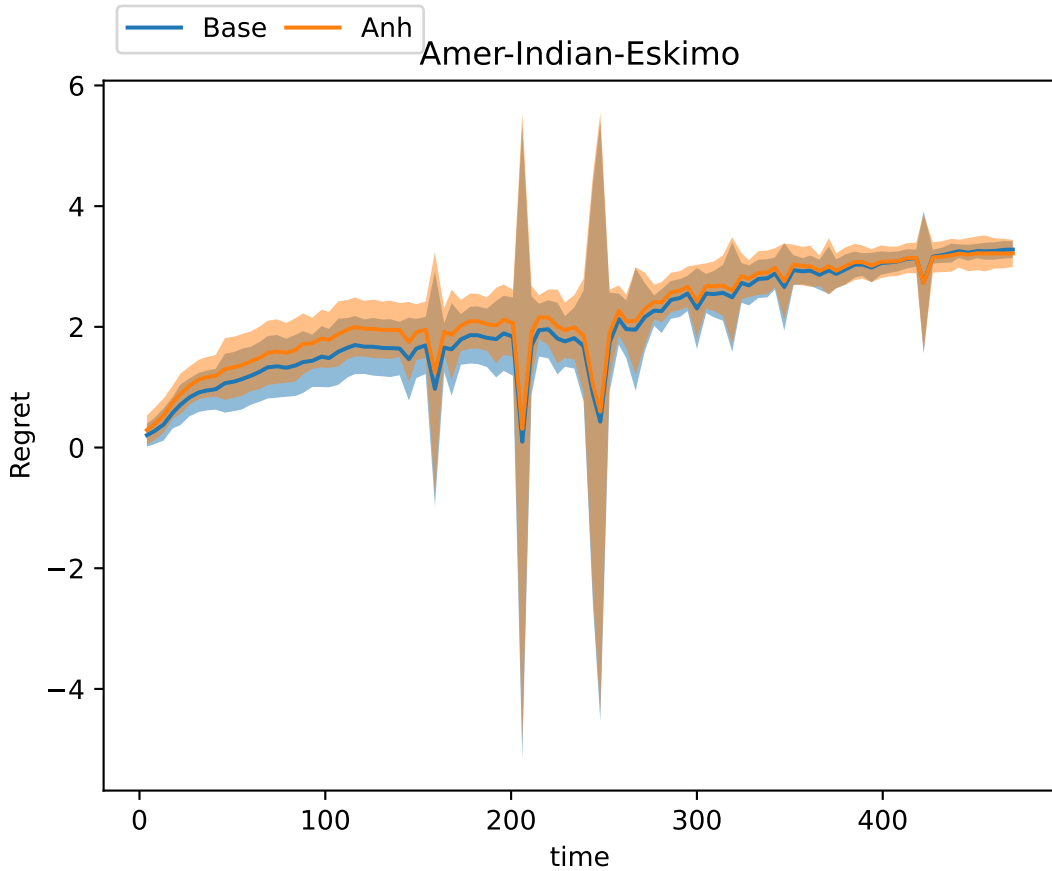

Supplement: supplementary_material [file attachment]

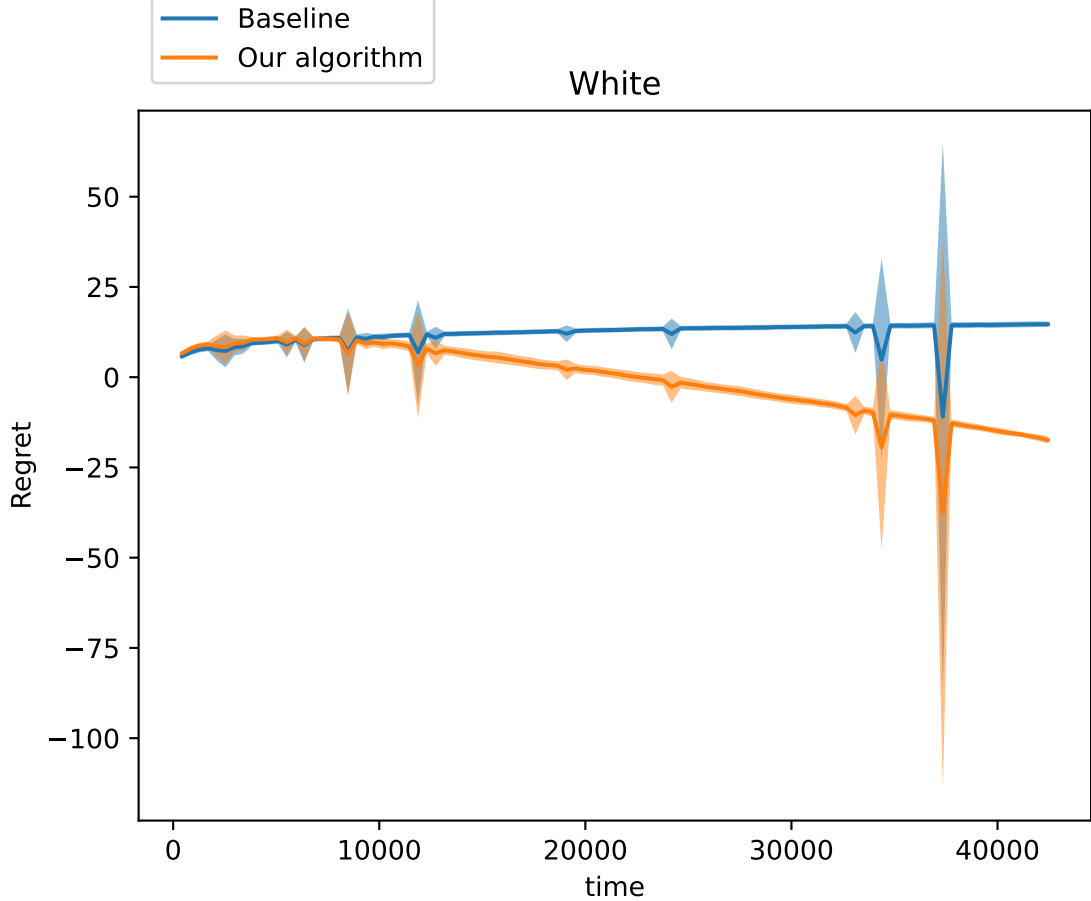

Supplement: supplementary_material [file attachment]

non-smoker

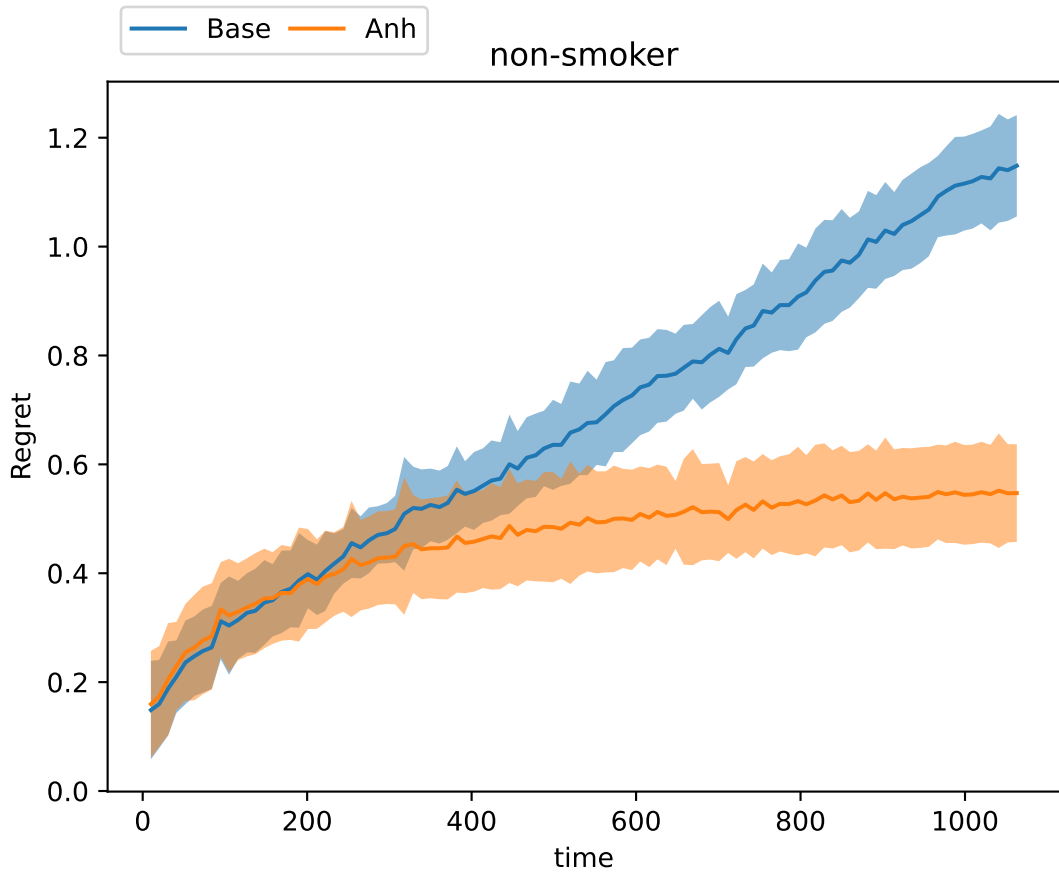

Supplement: supplementary_material [file attachment]

## Asian-Pac-Islander

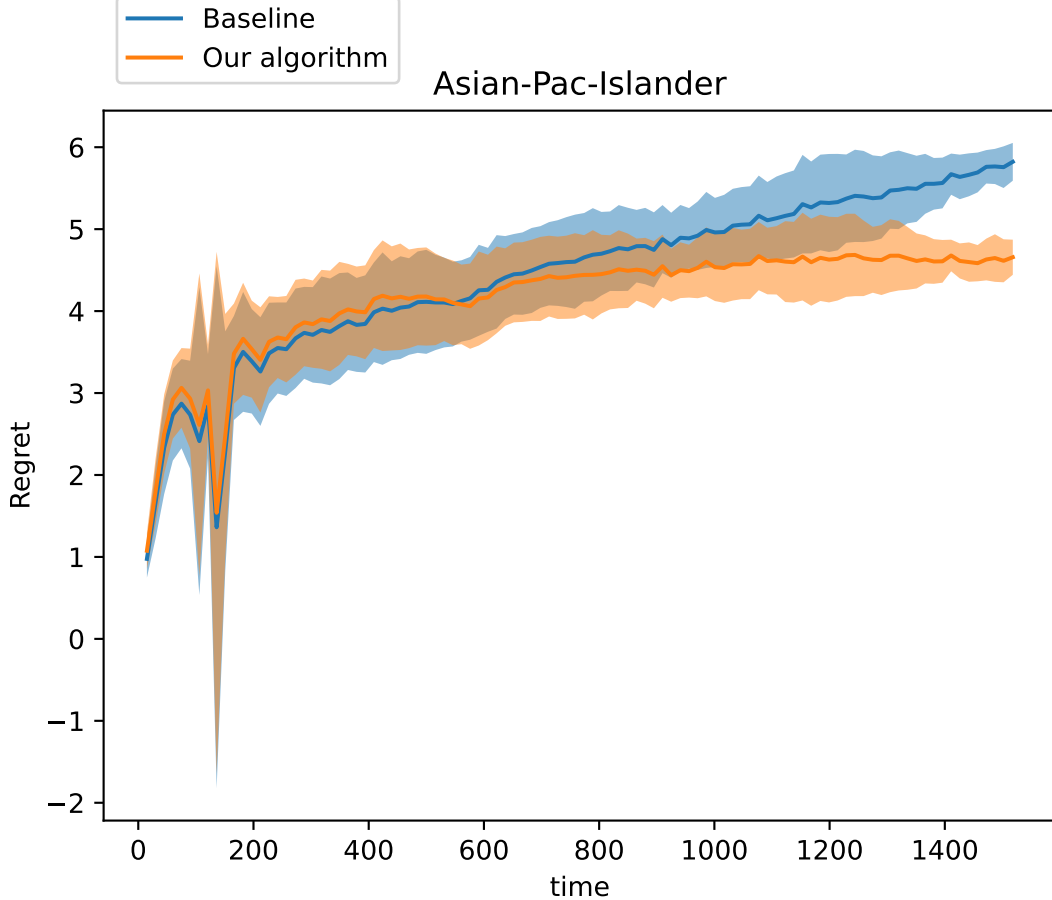

Supplement: supplementary_material [file attachment]

# Asian-Pac-Islander

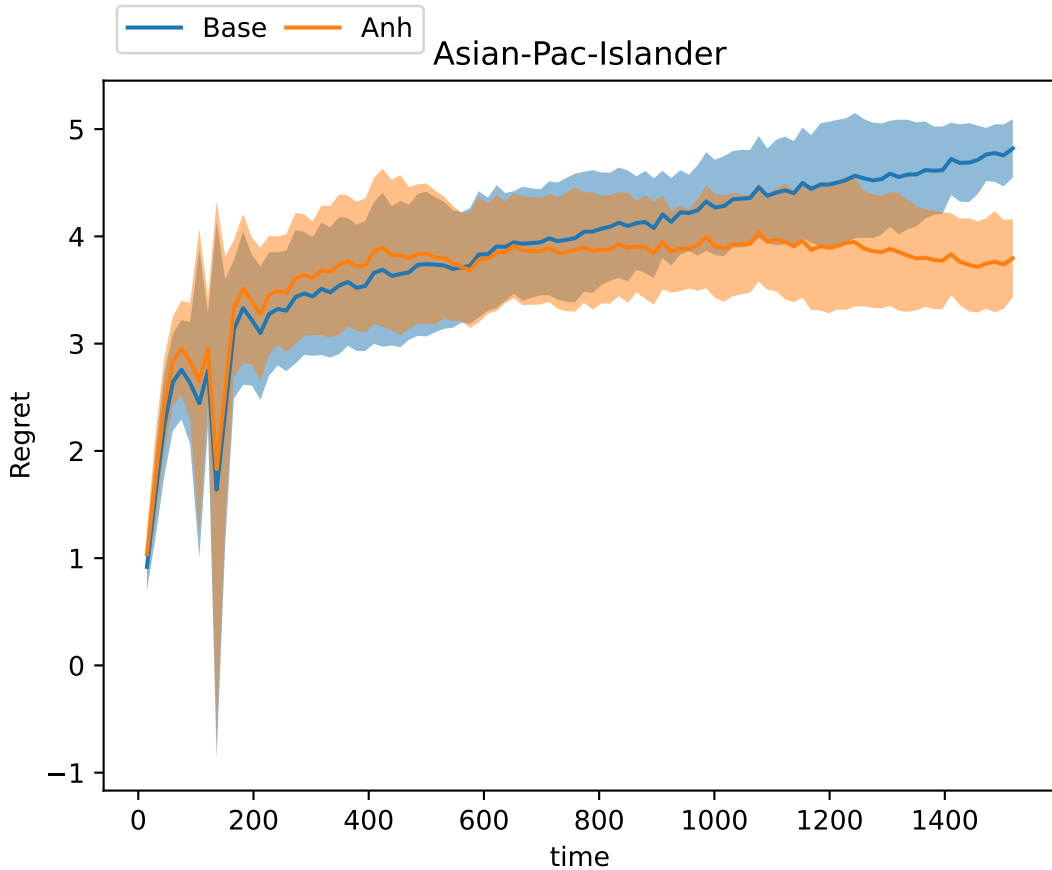

Supplement: supplementary_material [file attachment]

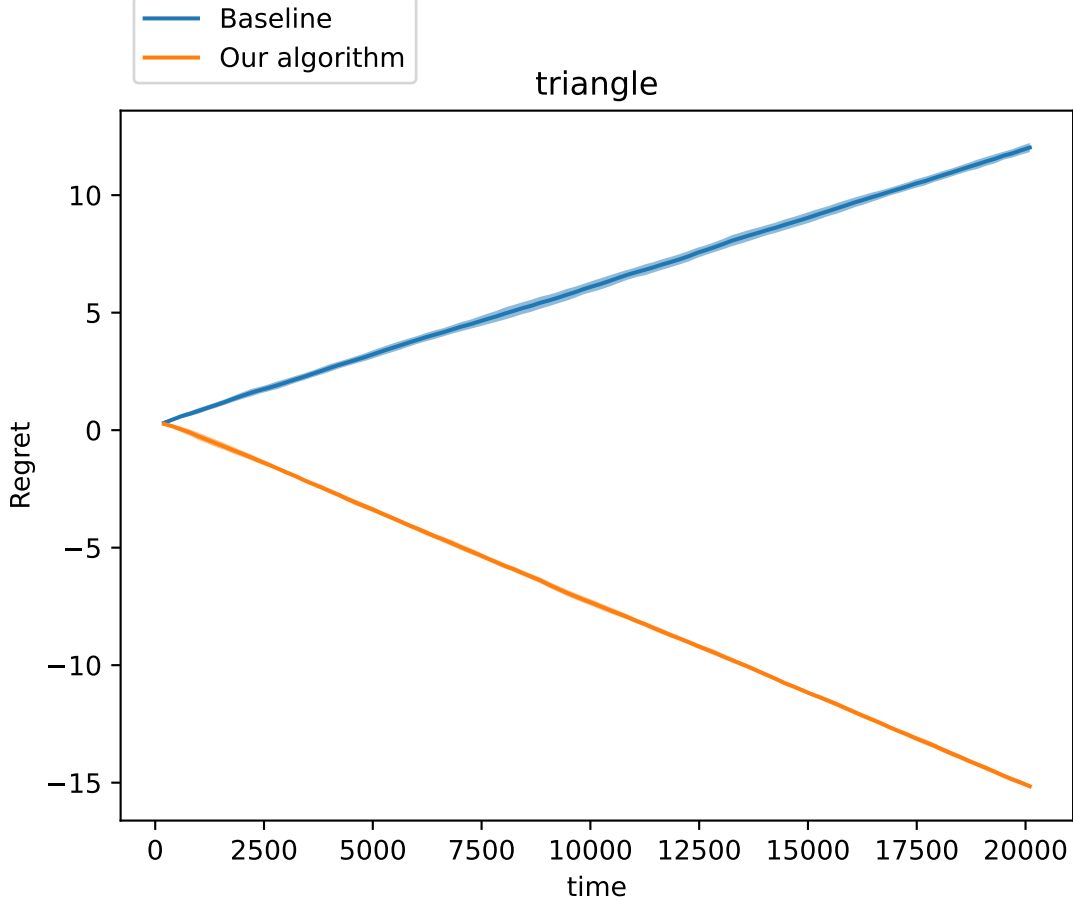

Supplement: supplementary_material [file attachment]

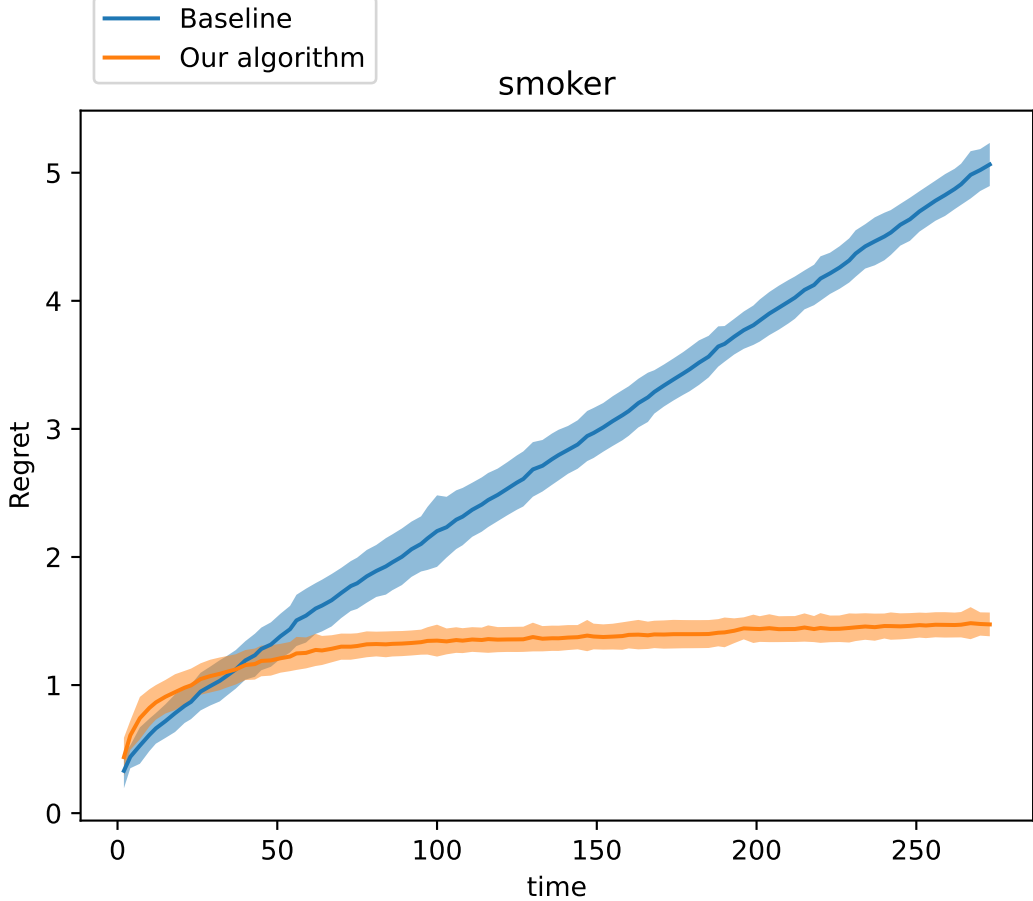

Supplement: supplementary_material [file attachment]

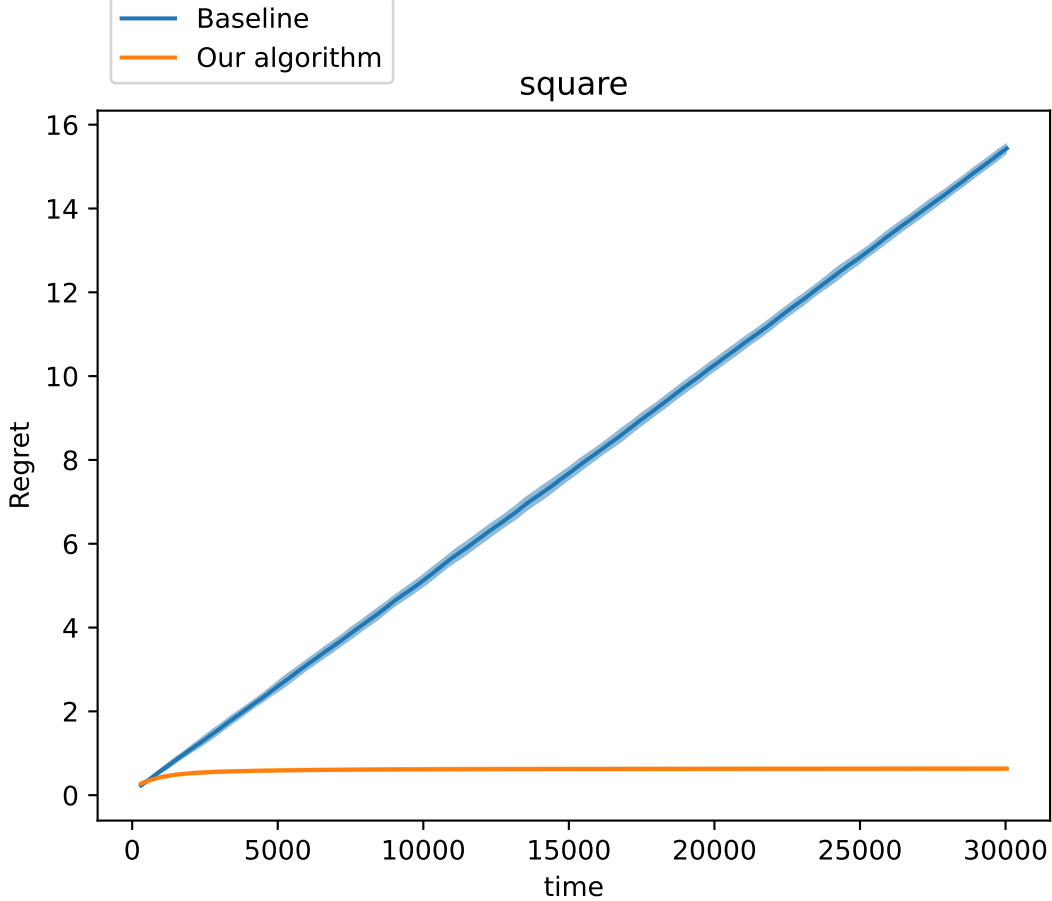

Supplement: supplementary_material [file attachment]

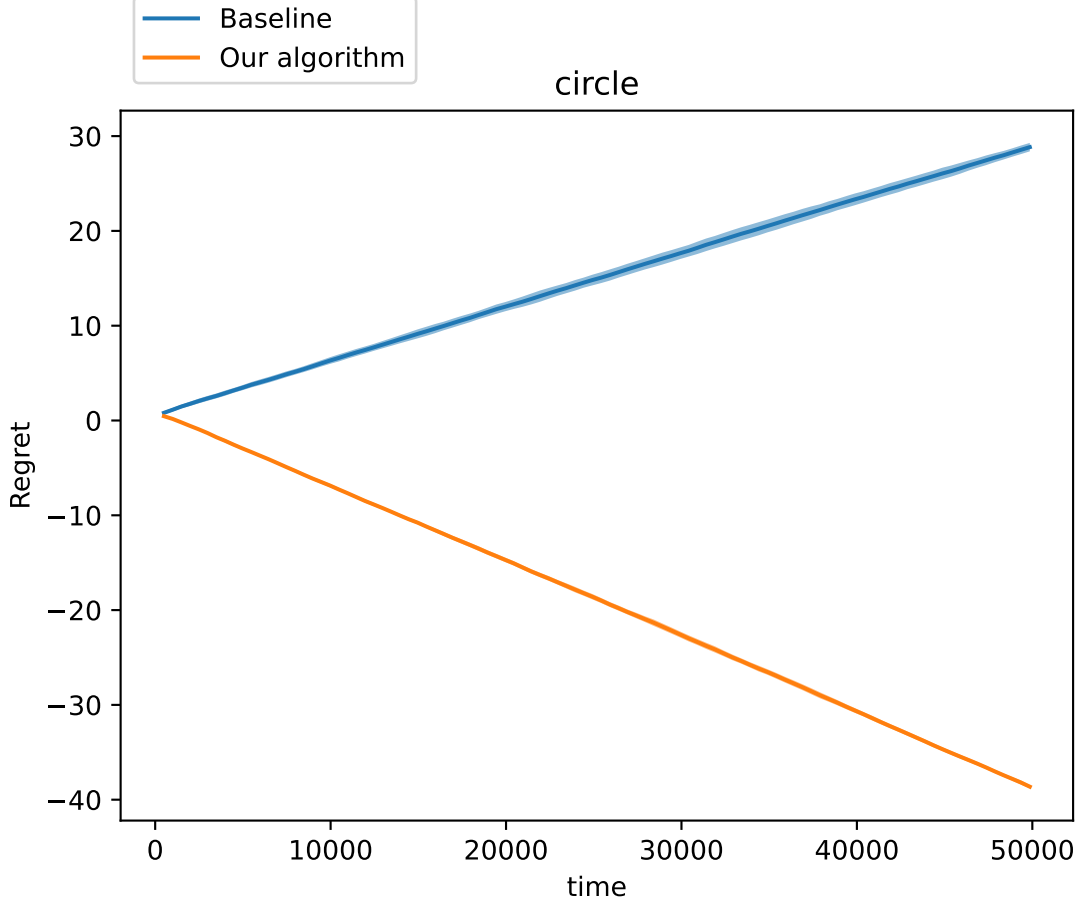

Supplement: supplementary_material [file attachment]

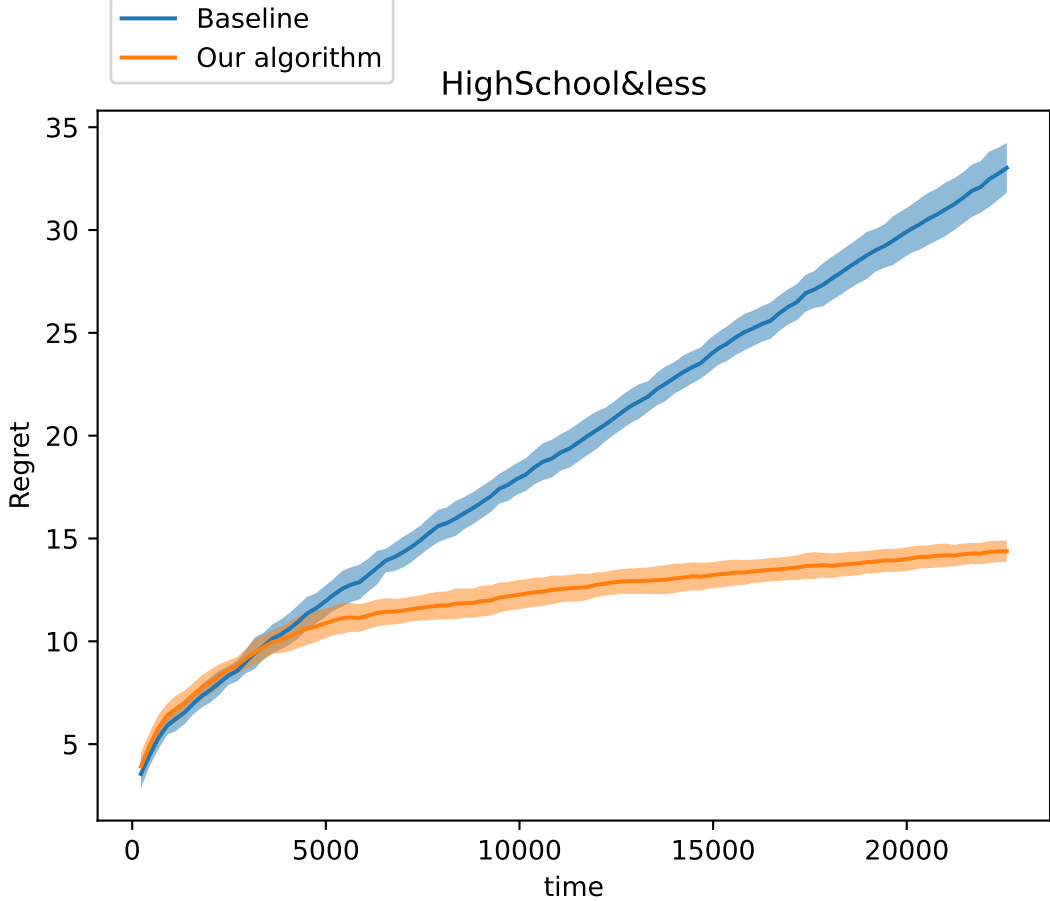

Supplement: supplementary_material [file attachment]

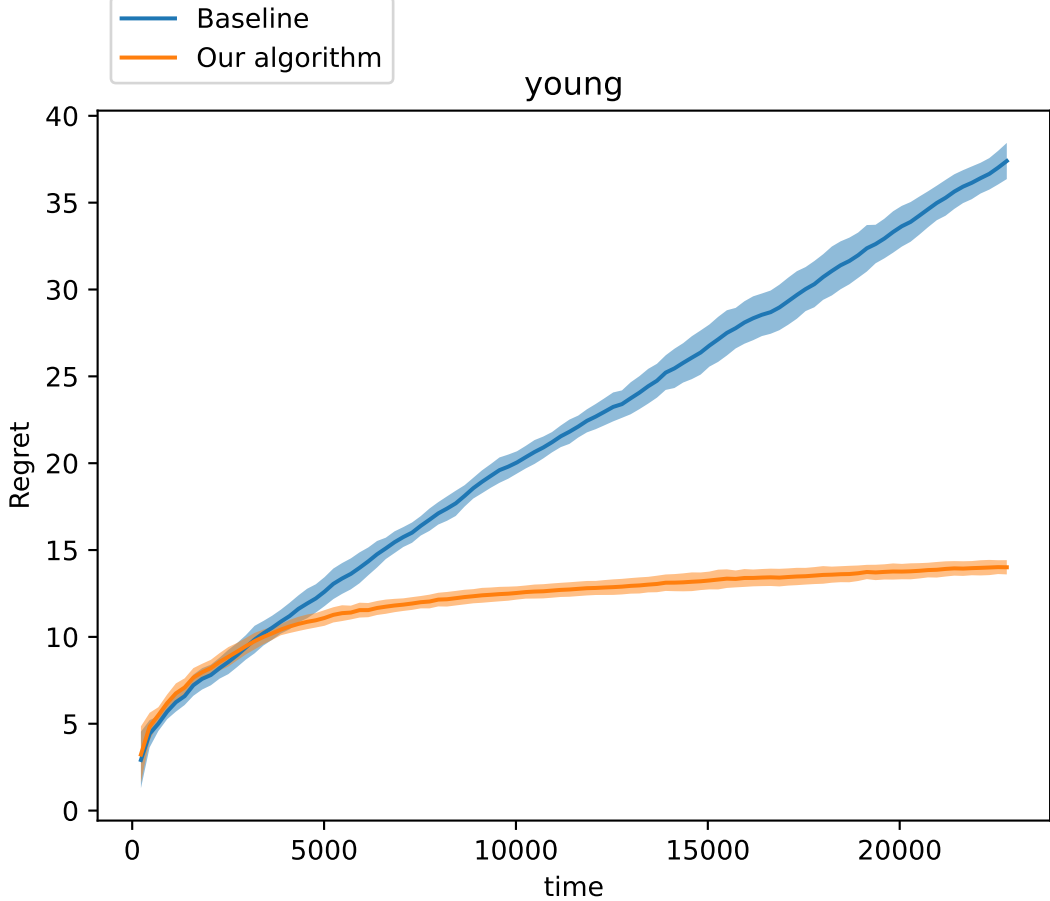

Supplement: supplementary_material [file attachment]

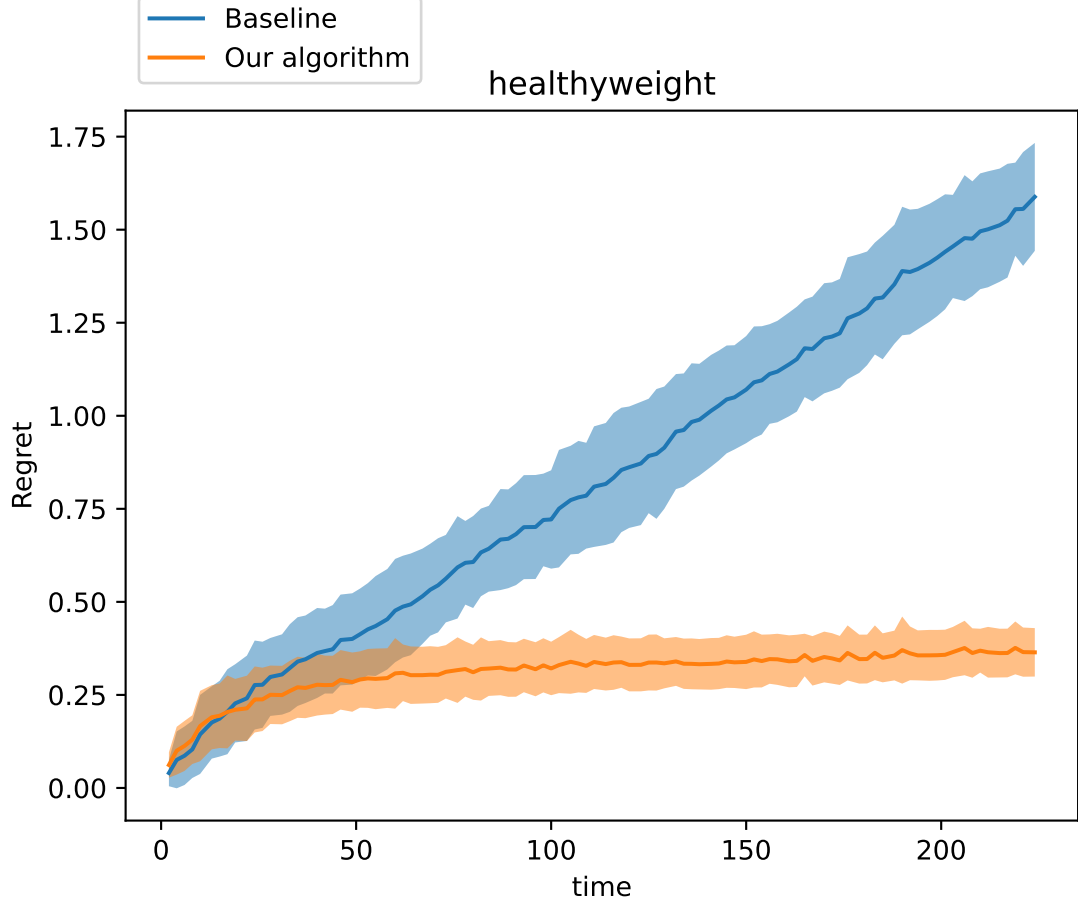

Supplement: supplementary_material [file attachment]

Black

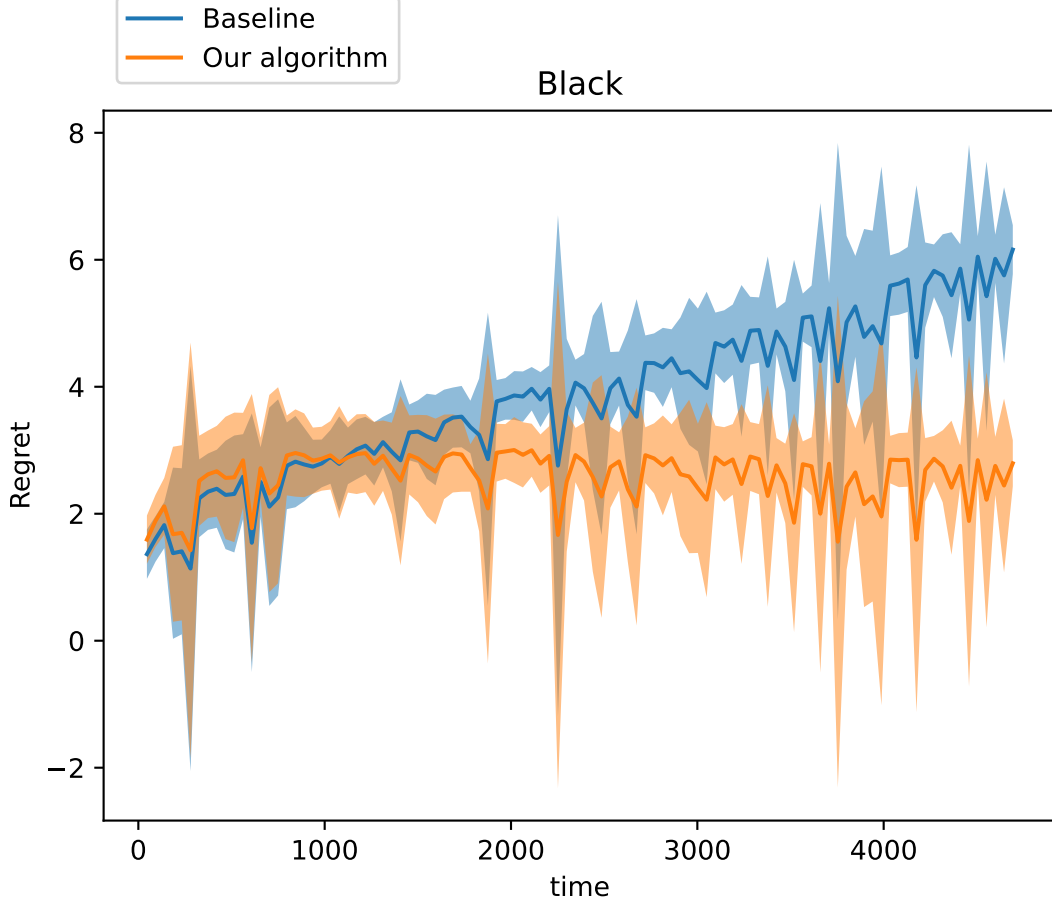

Supplement: supplementary_material [file attachment]

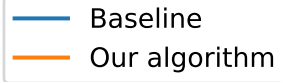

female

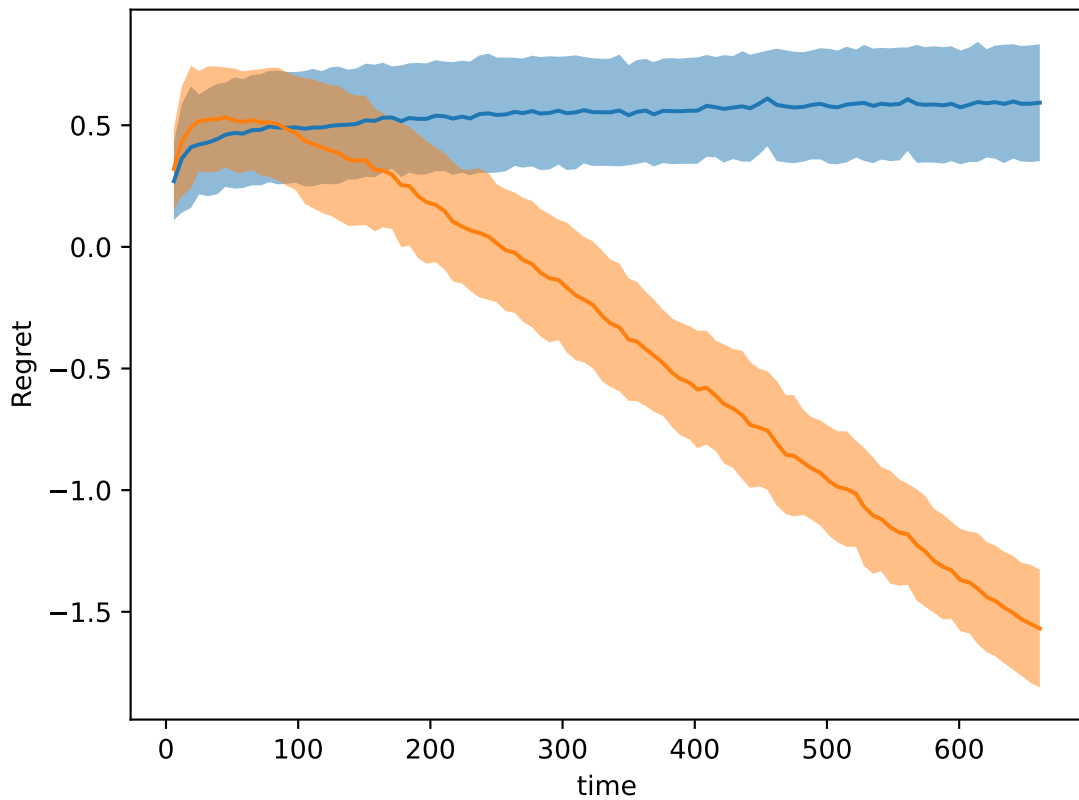

Supplement: supplementary_material [file attachment]

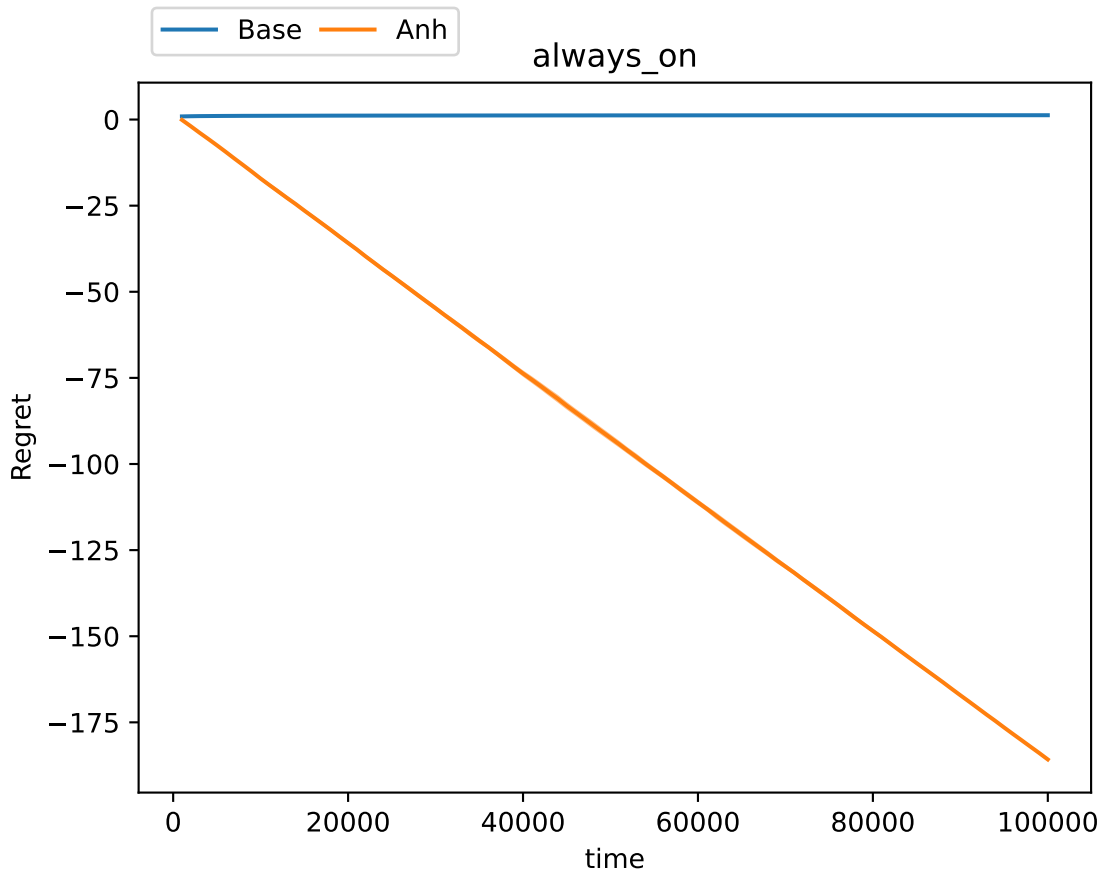

Supplement: supplementary_material [file attachment]

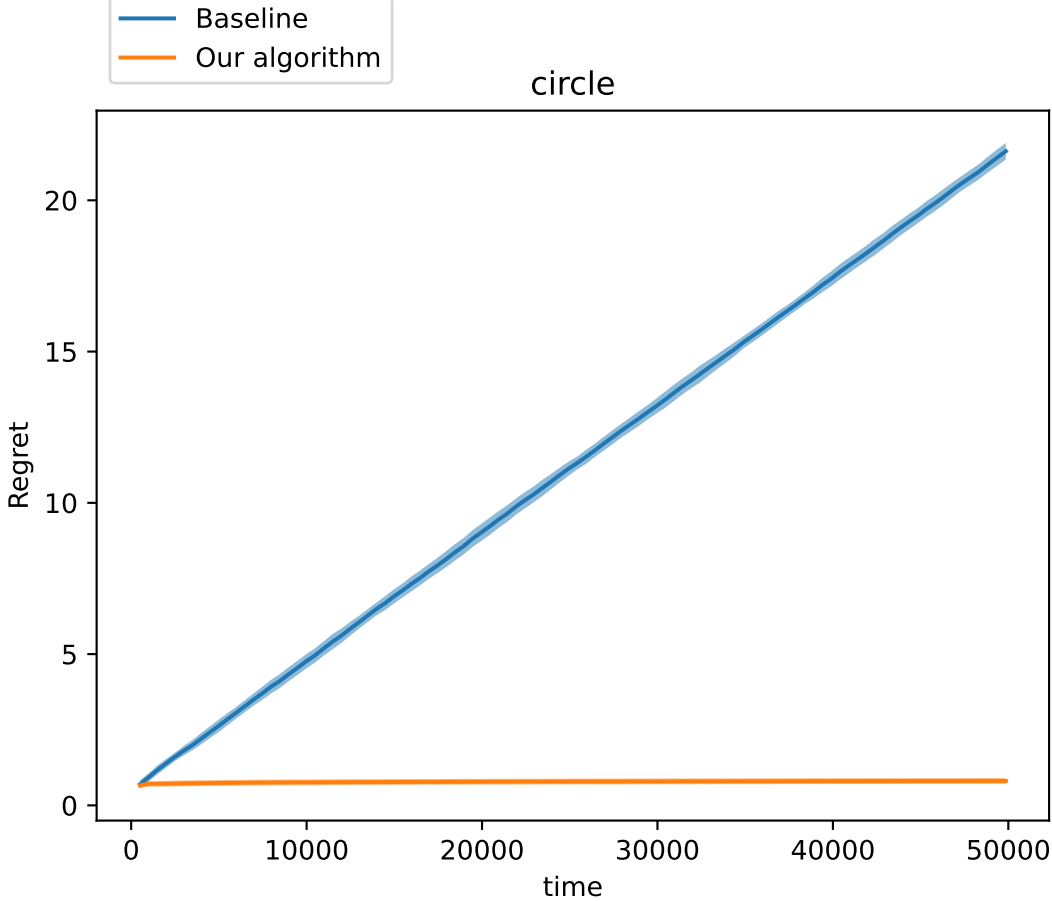

Supplement: supplementary_material [file attachment]



middle

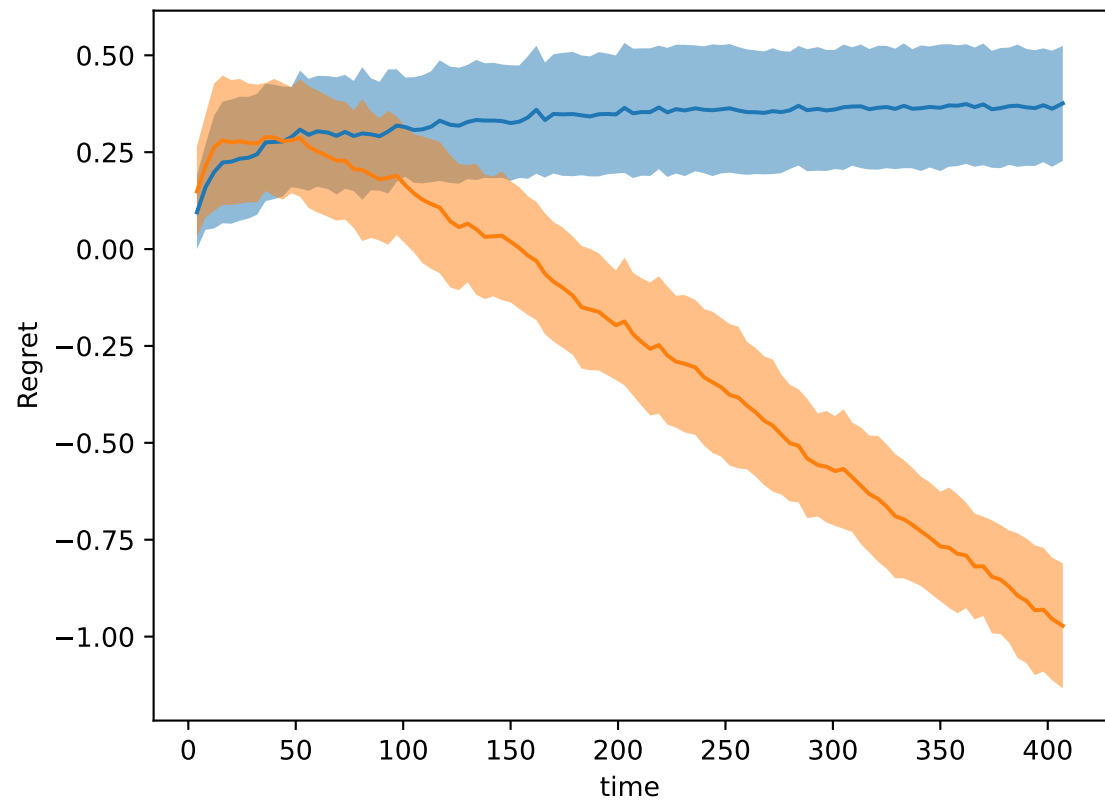

Supplement: supplementary_material [file attachment]

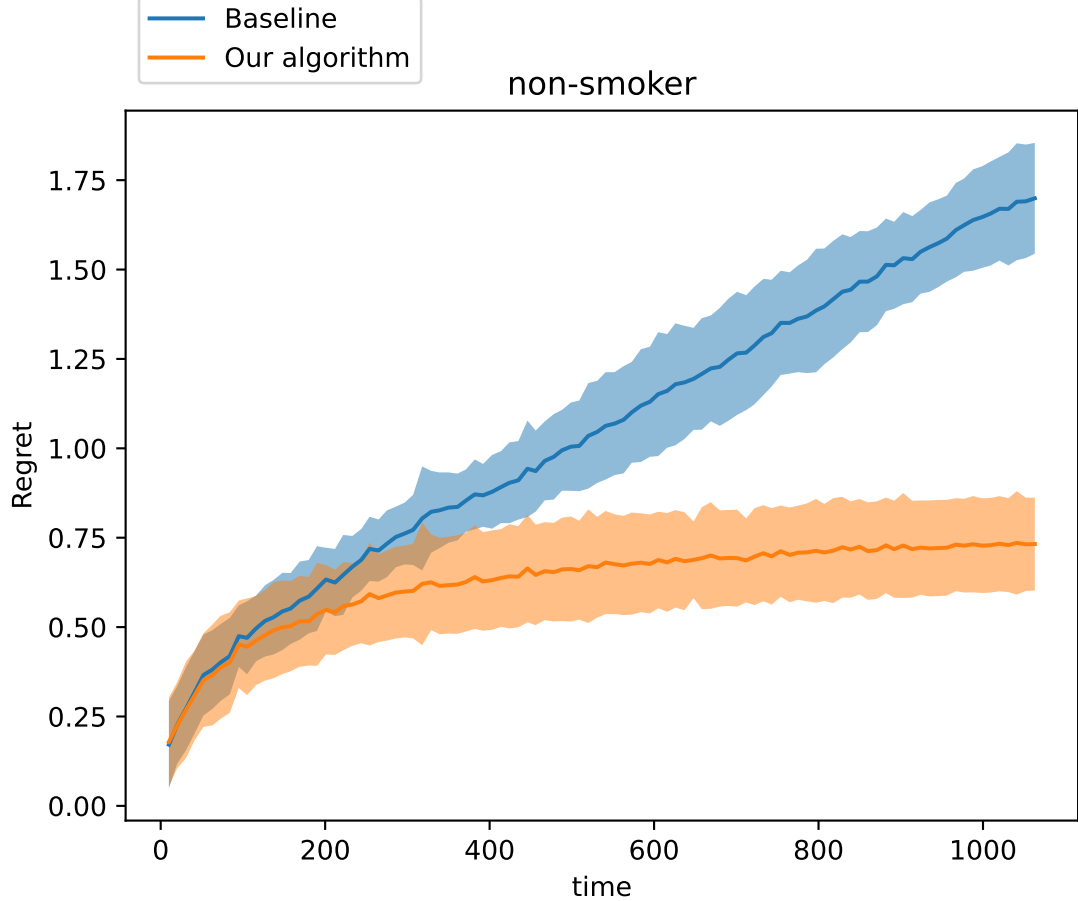

Supplement: supplementary_material [file attachment]

Female

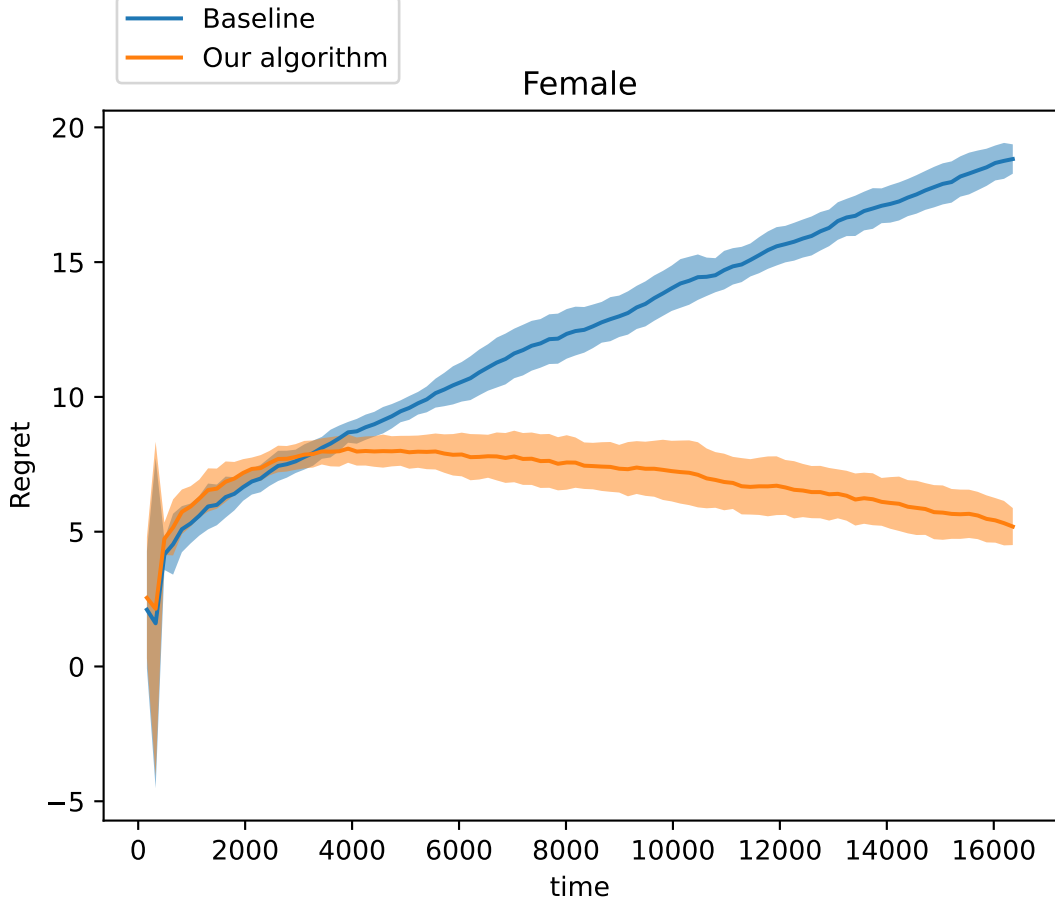

Supplement: supplementary_material [file attachment]

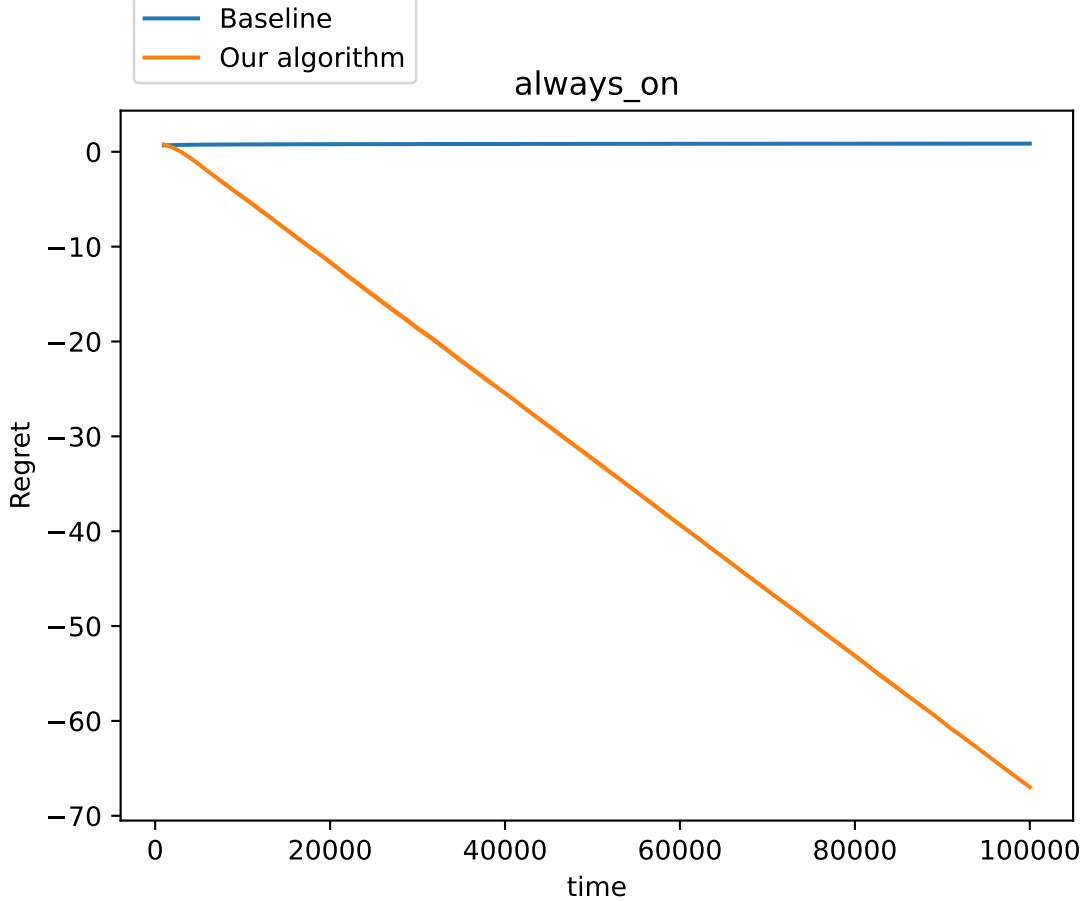

Supplement: supplementary_material [file attachment]

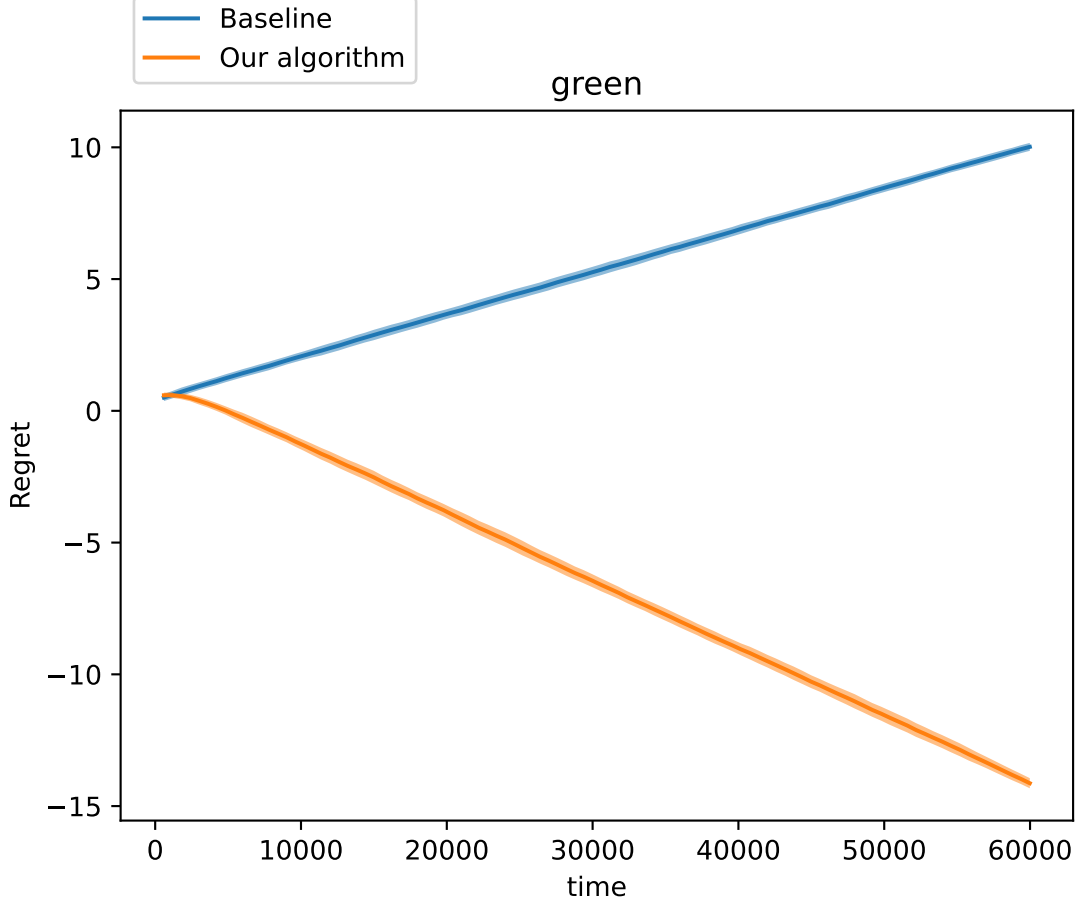

Supplement: supplementary_material [file attachment]

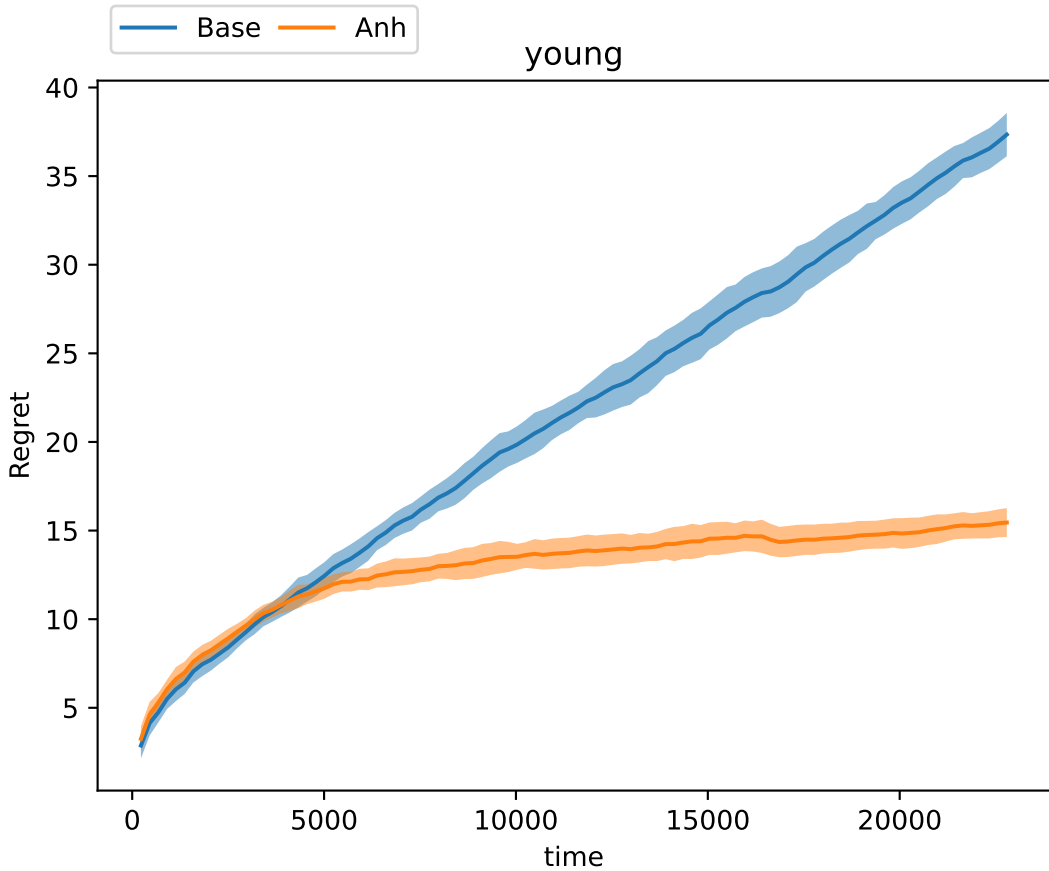

Supplement: supplementary_material [file attachment]

Baseline  
Our algorithm

old

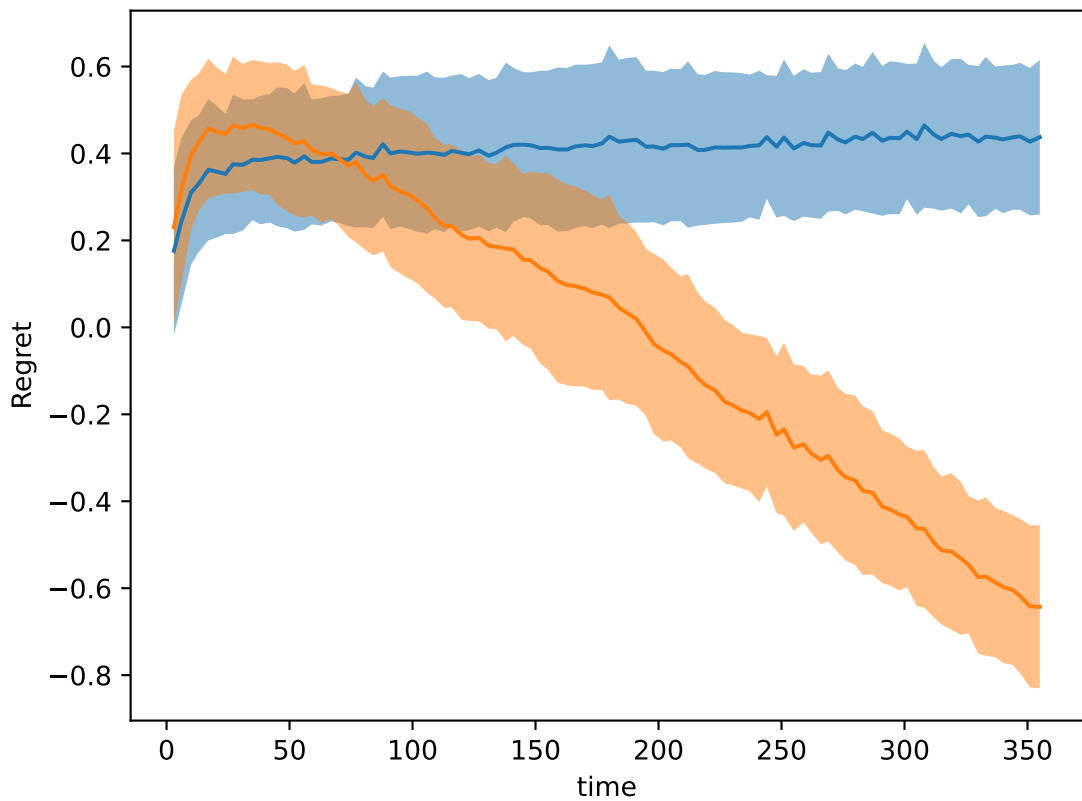

Supplement: supplementary_material [file attachment]

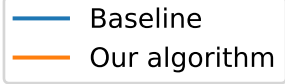

young

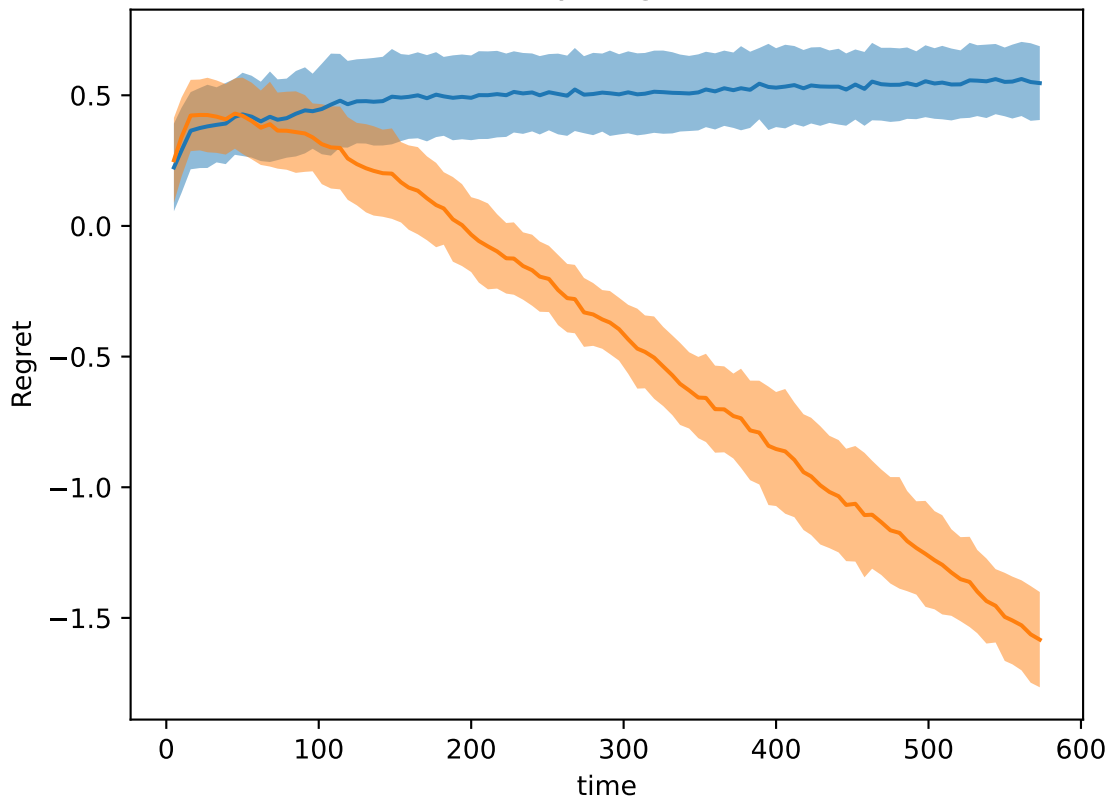

Supplement: supplementary_material [file attachment]

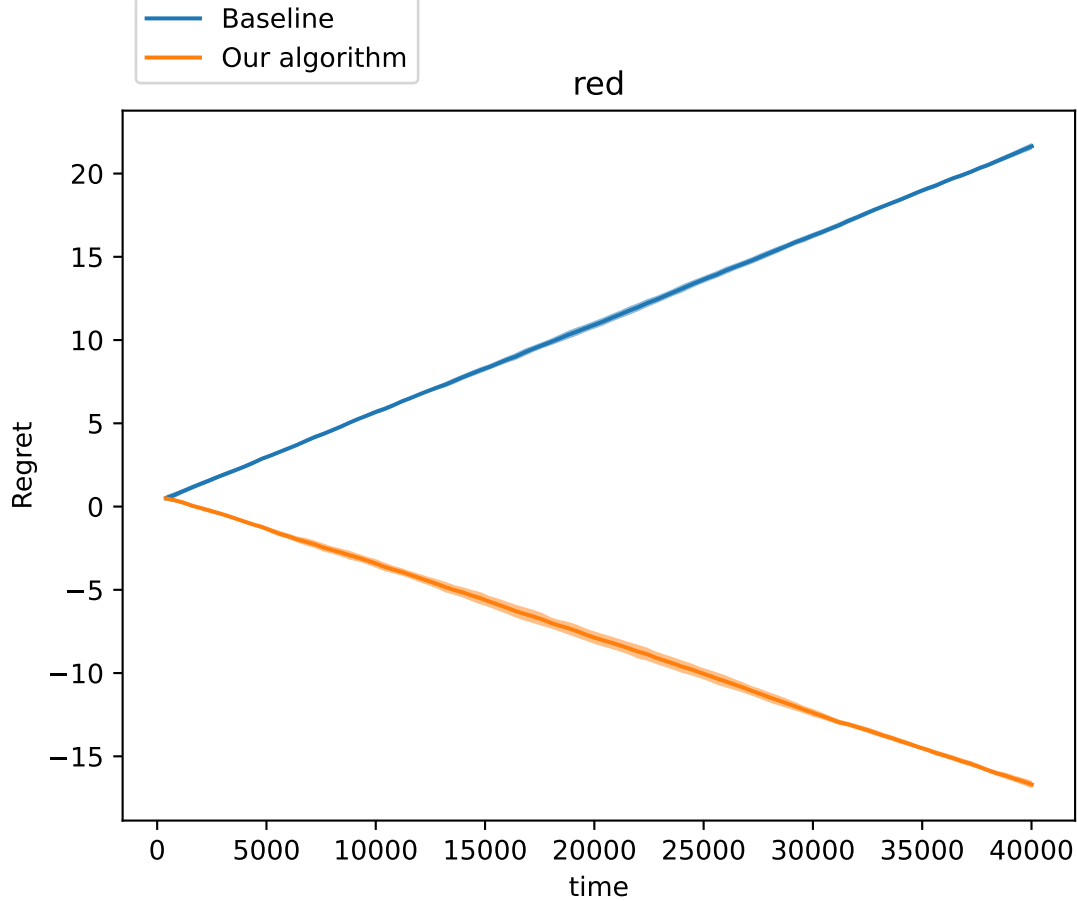

Supplement: supplementary_material [file attachment]

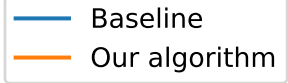

male

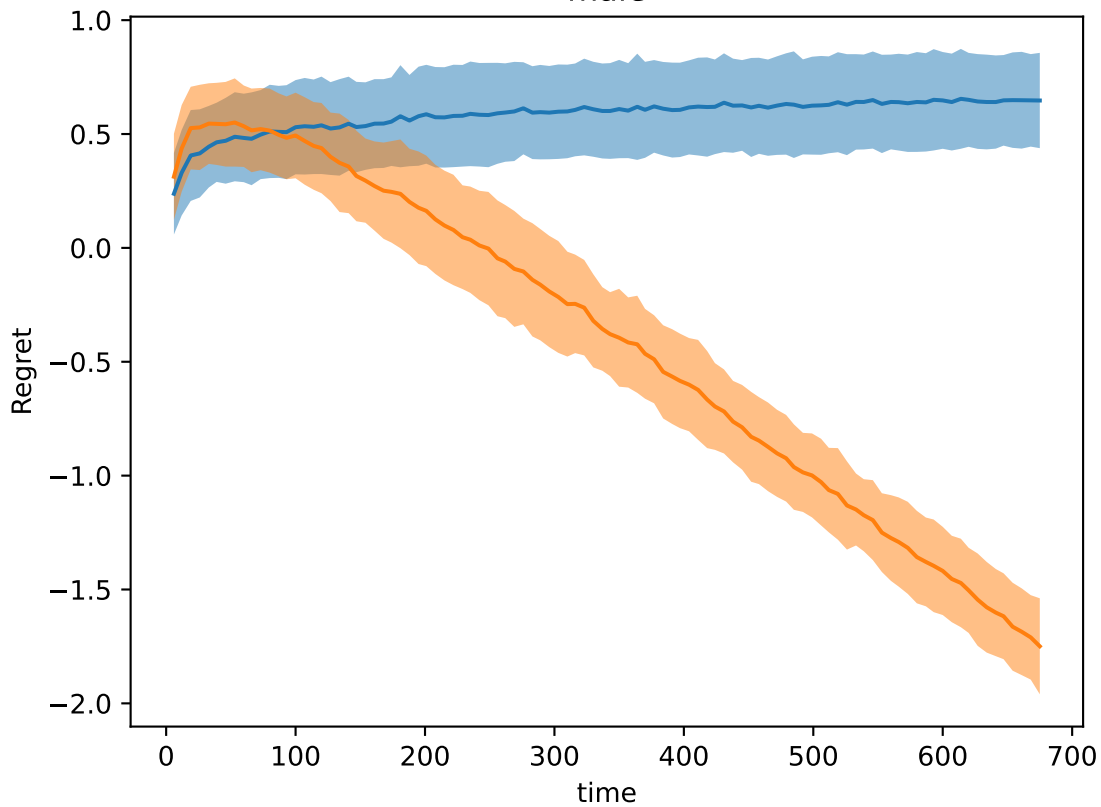

Supplement: supplementary_material [file attachment]

green

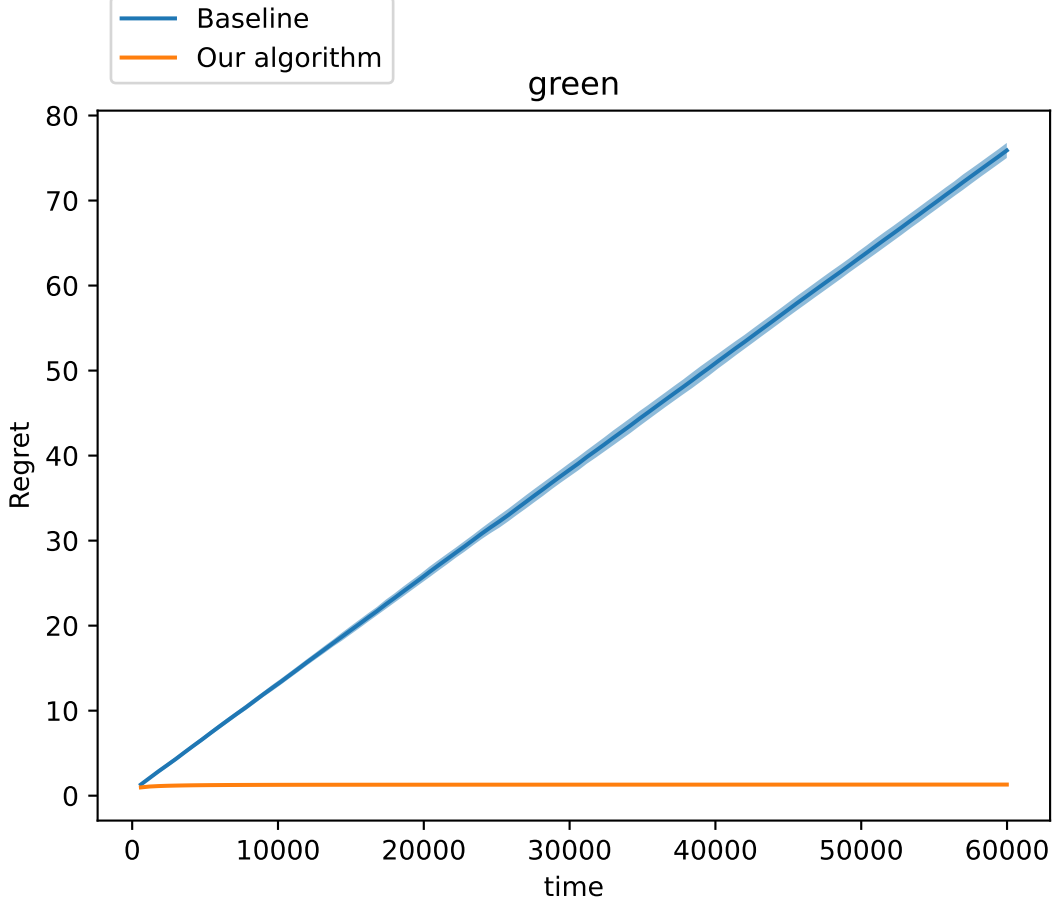

Supplement: supplementary_material [file attachment]

obese

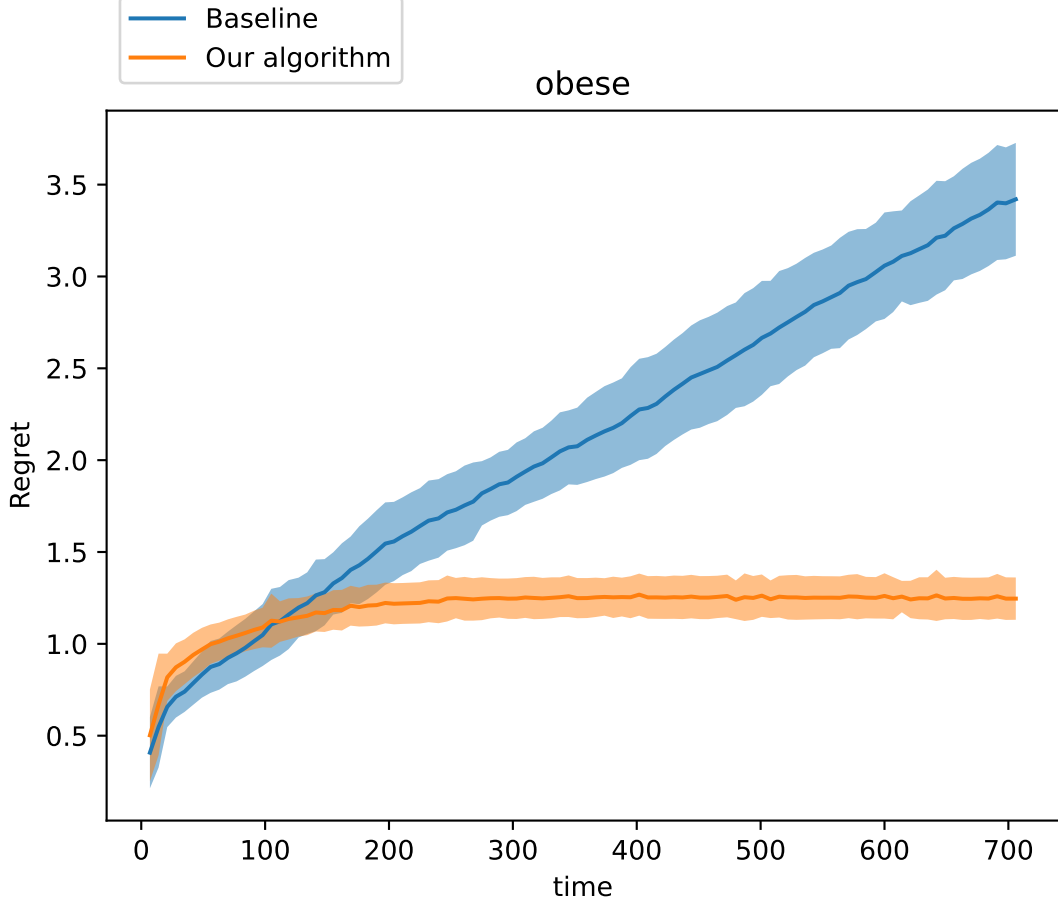

Supplement: supplementary_material [file attachment]

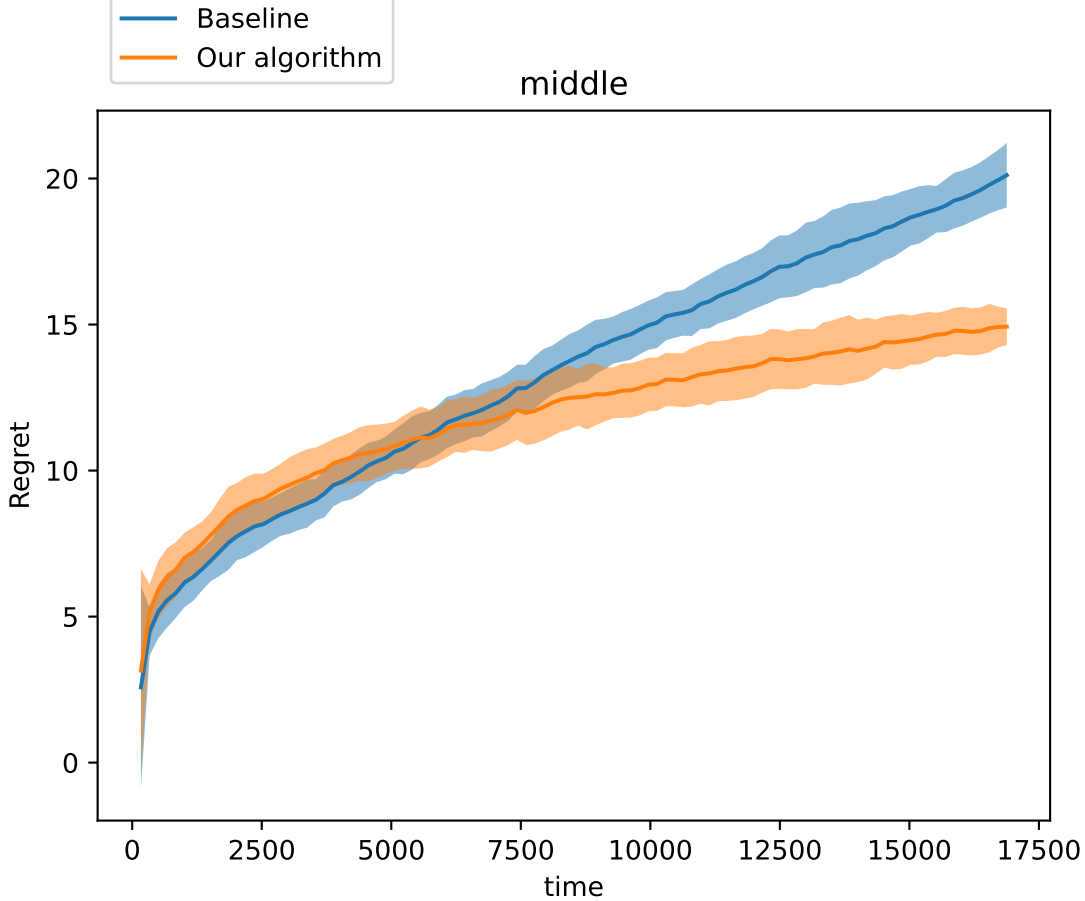

Supplement: supplementary_material [file attachment]

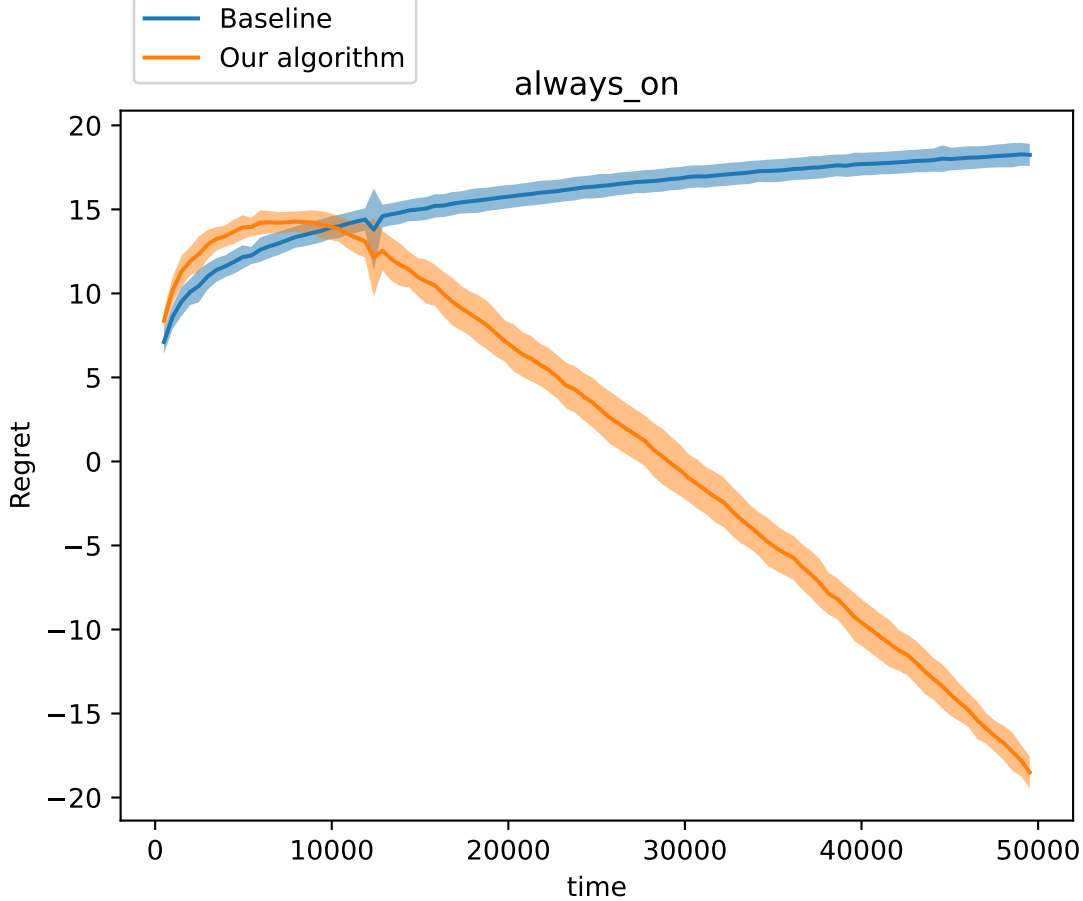

Supplement: supplementary_material [file attachment]

Baseline  
Our algorithm

# Amer-Indian-Eskimo

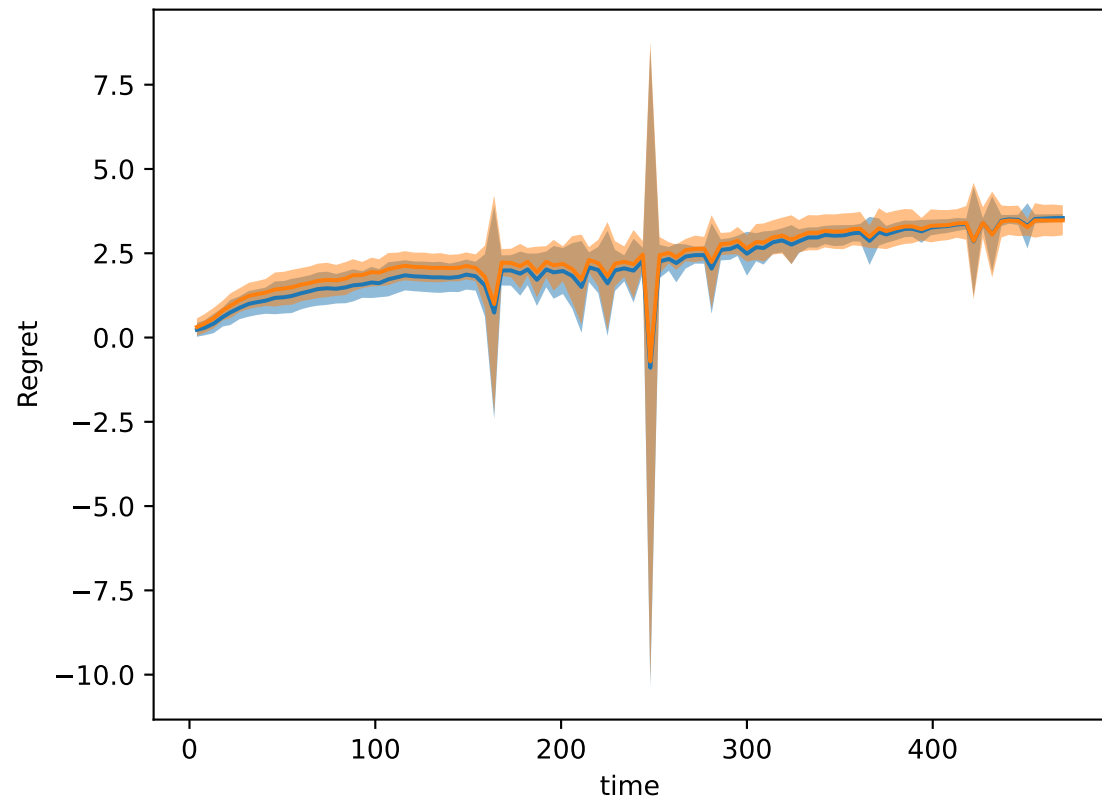

Supplement: supplementary_material [file attachment]

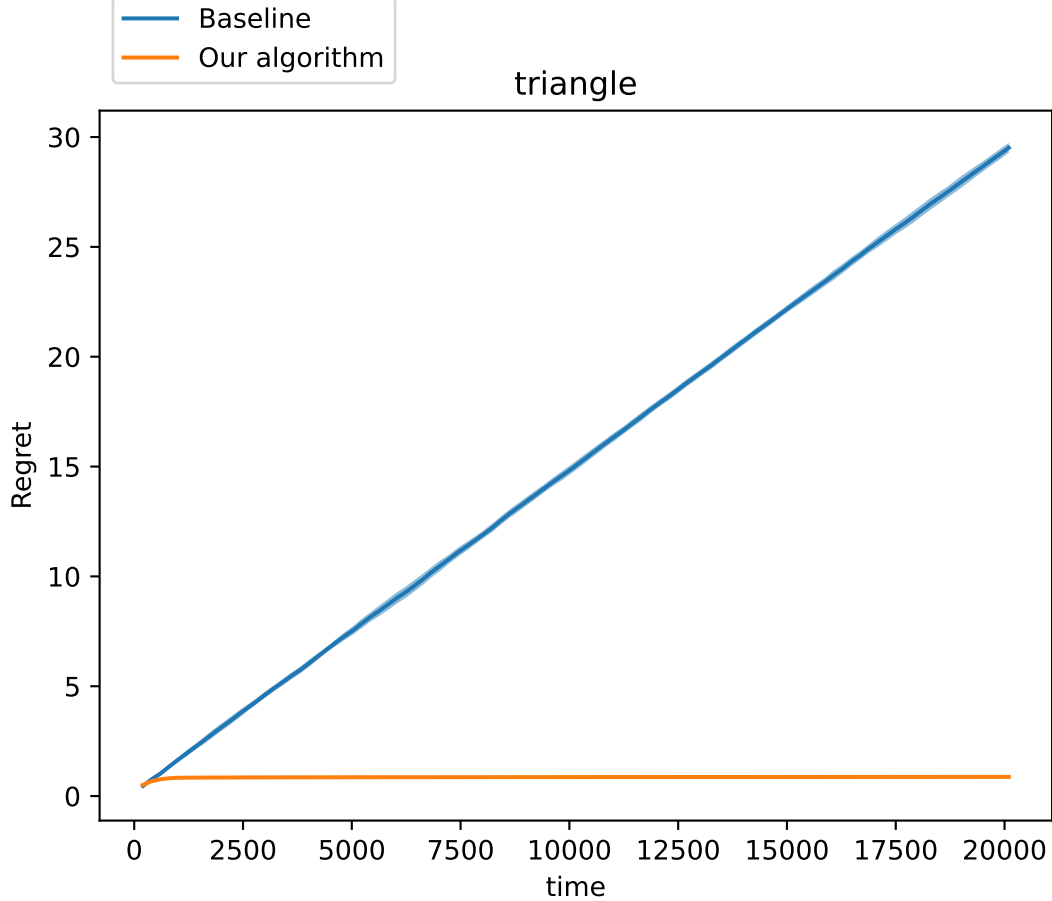

Supplement: supplementary_material [file attachment]

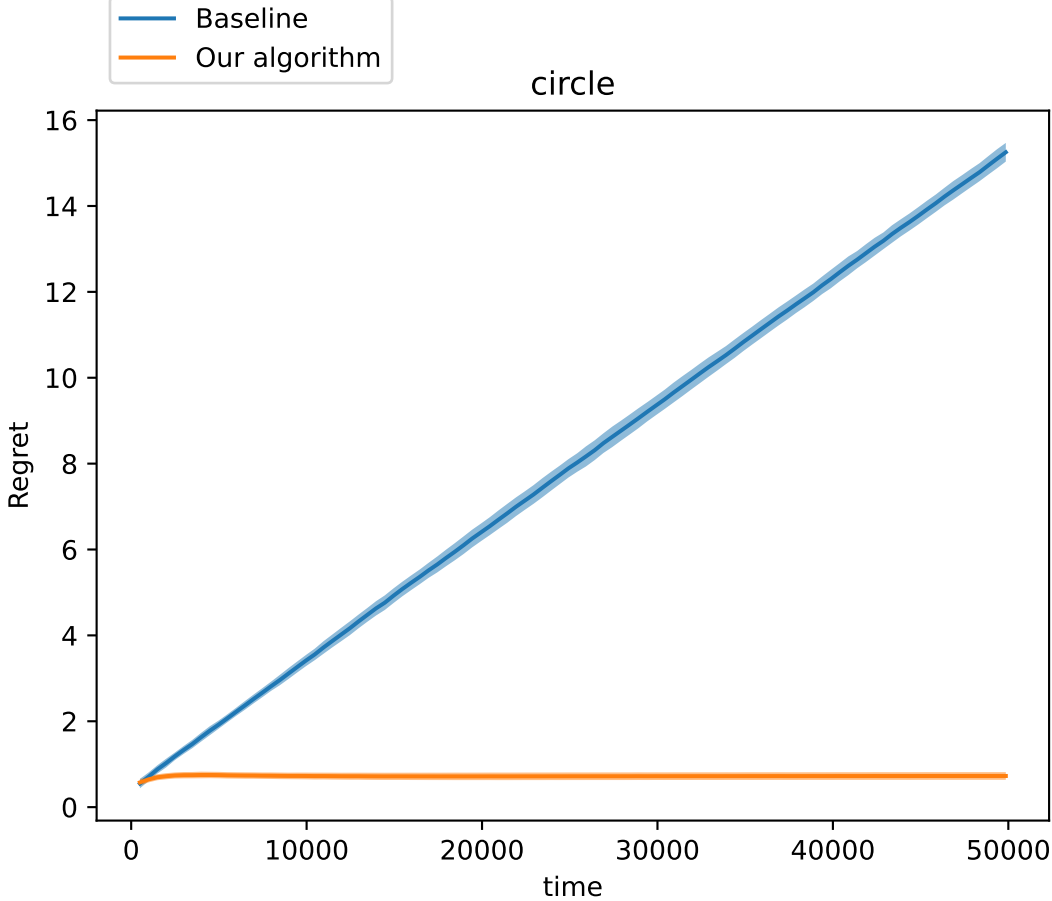

Supplement: supplementary_material [file attachment]

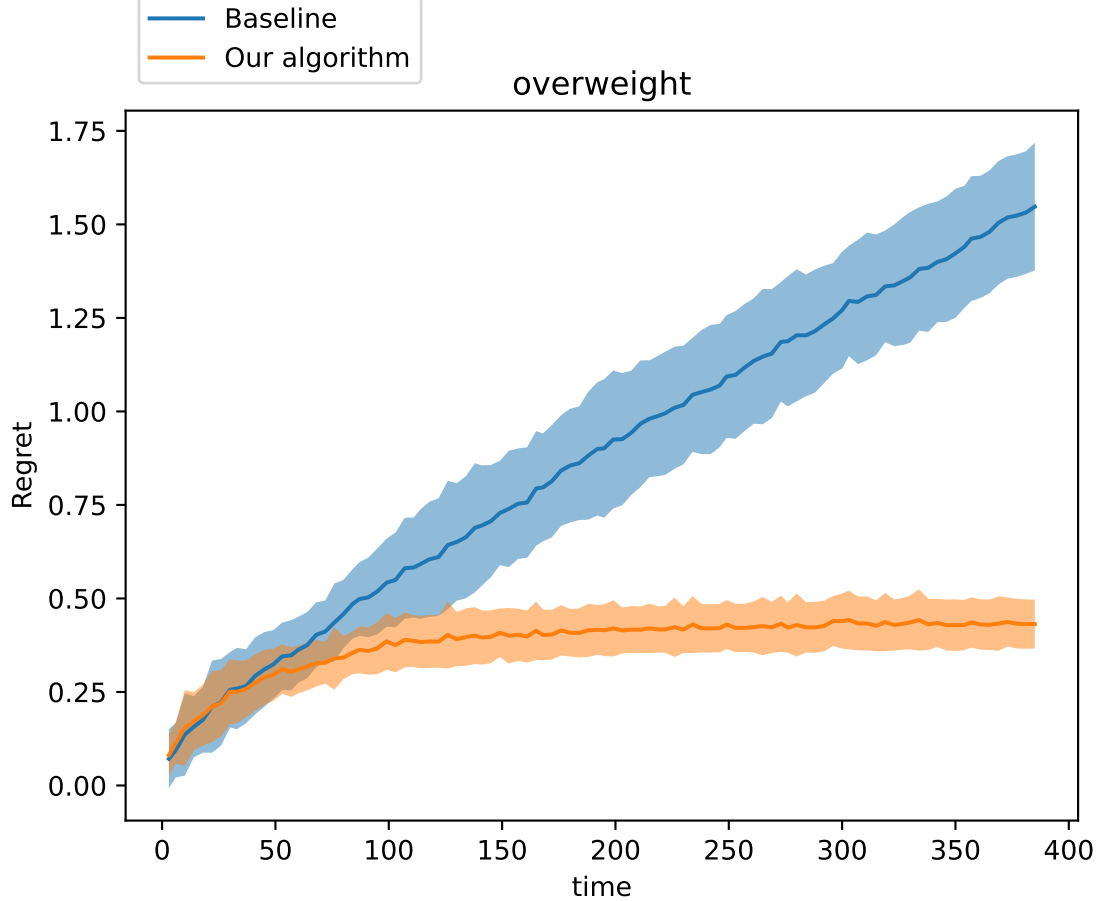

Supplement: supplementary_material [file attachment]

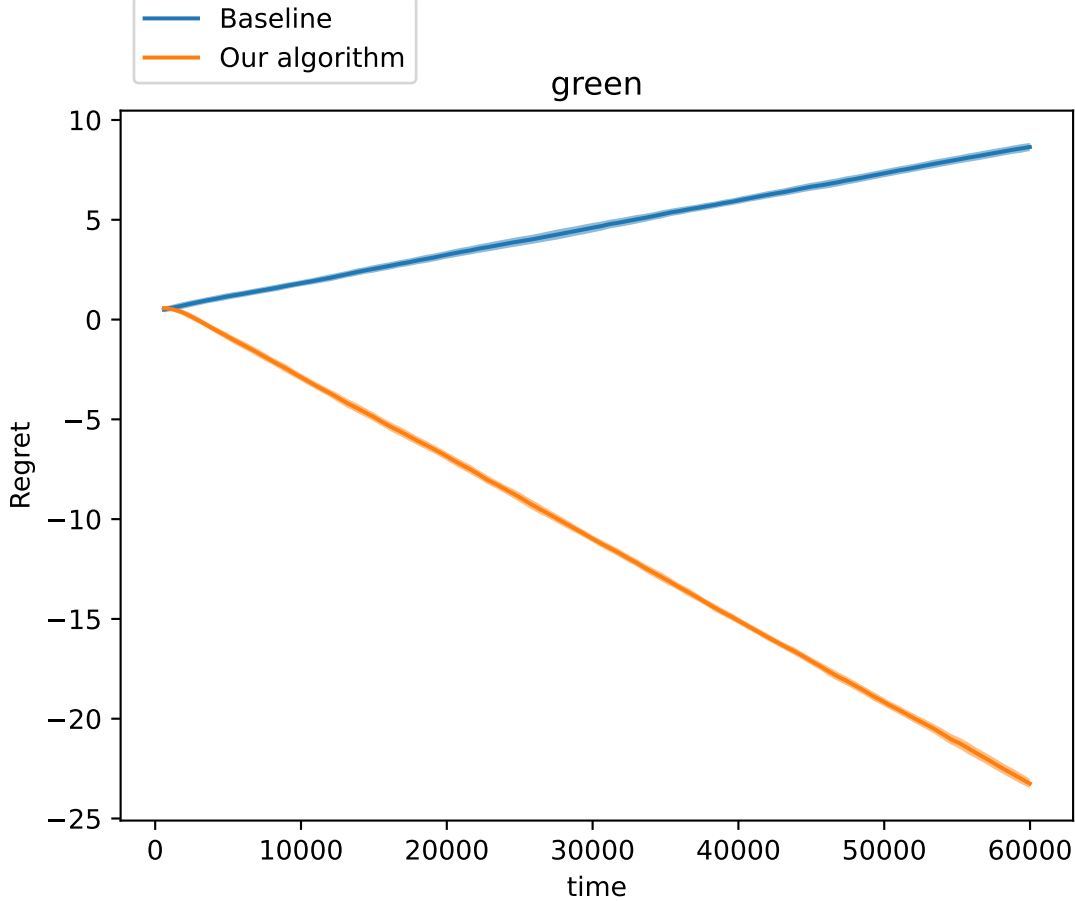

Supplement: supplementary_material [file attachment]

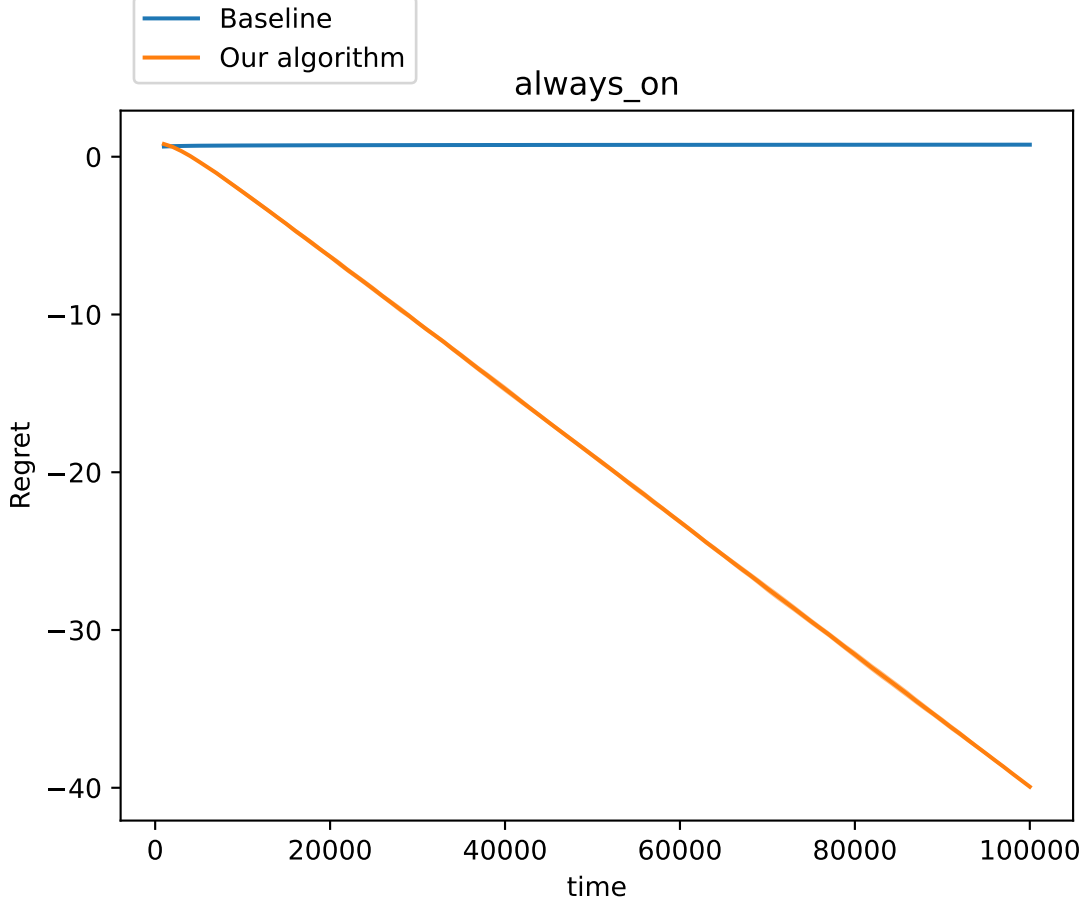

Supplement: supplementary_material [file attachment]

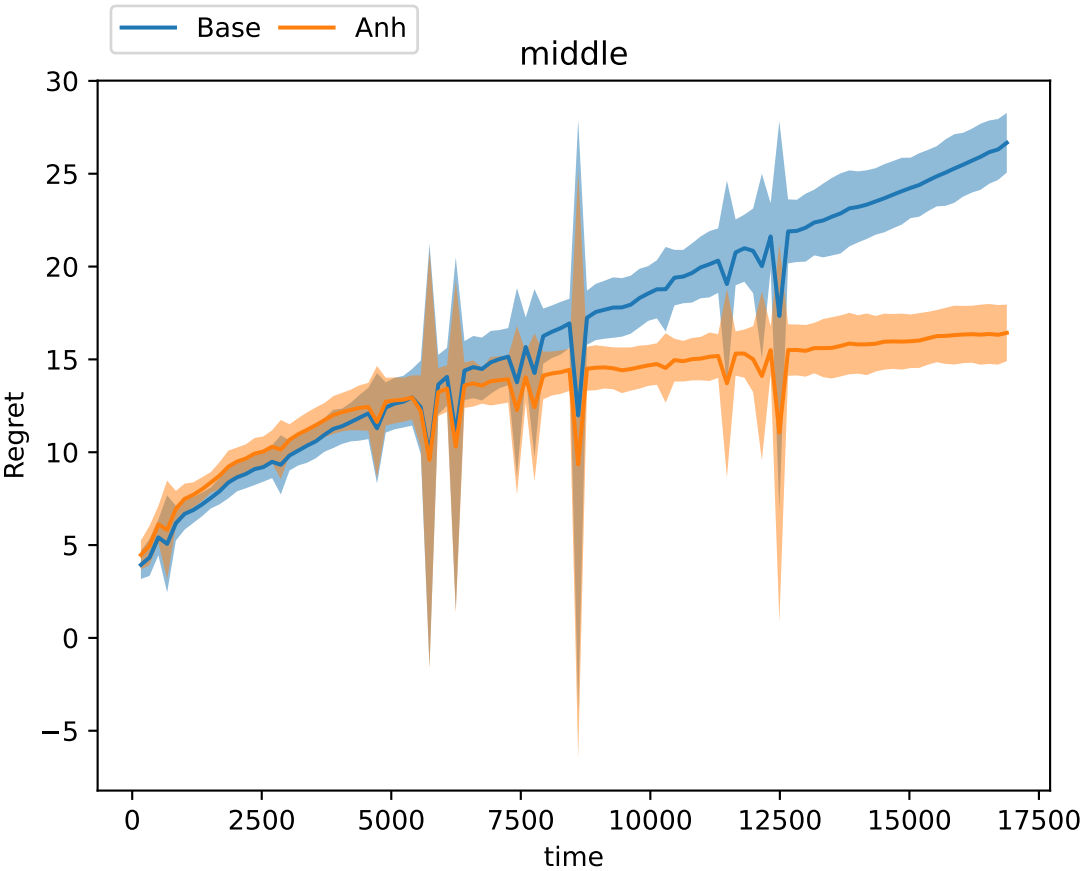

Supplement: supplementary_material [file attachment]

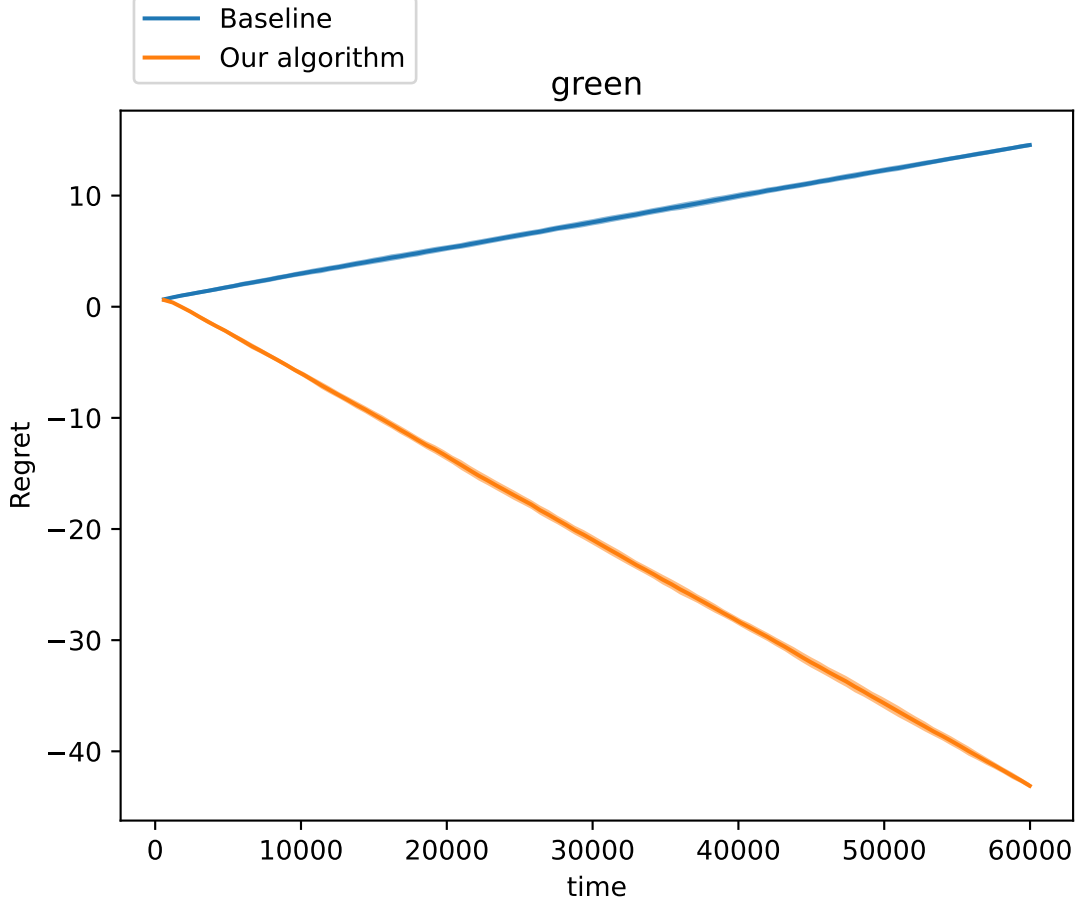

Supplement: supplementary_material [file attachment]

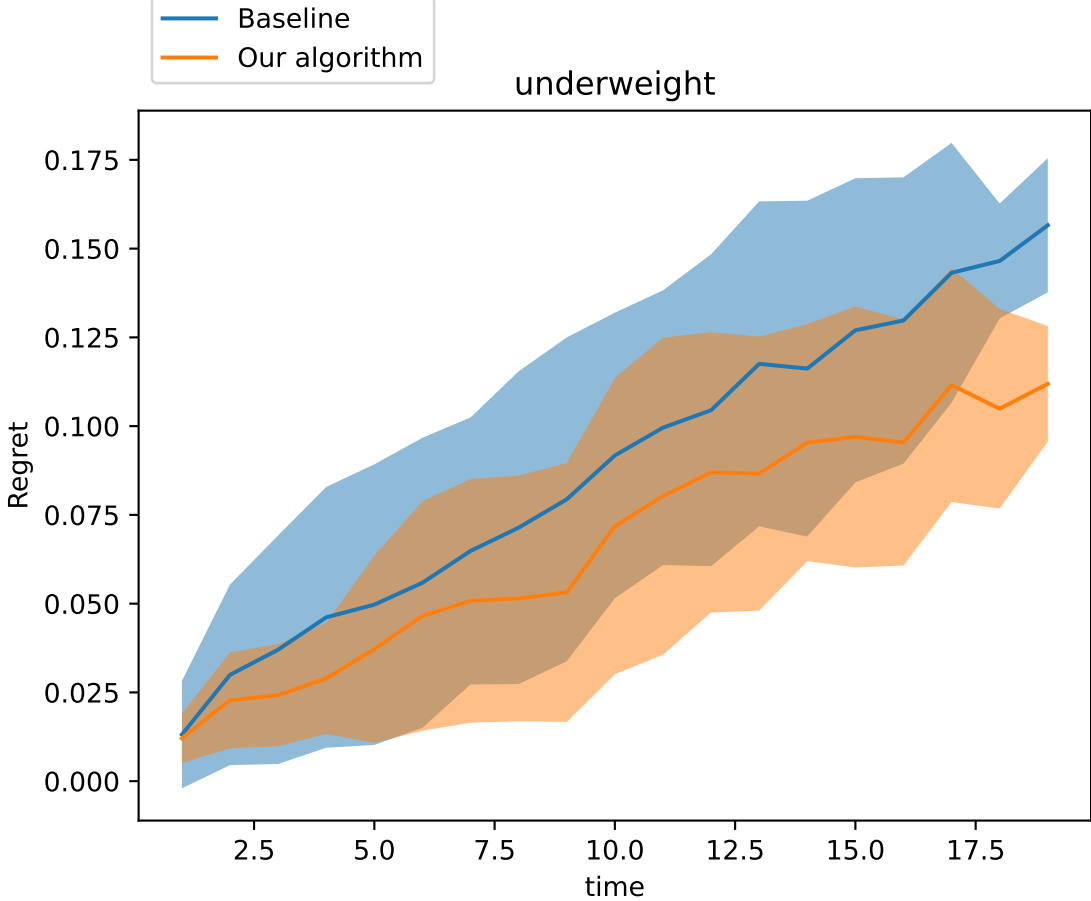

Supplement: supplementary_material [file attachment]

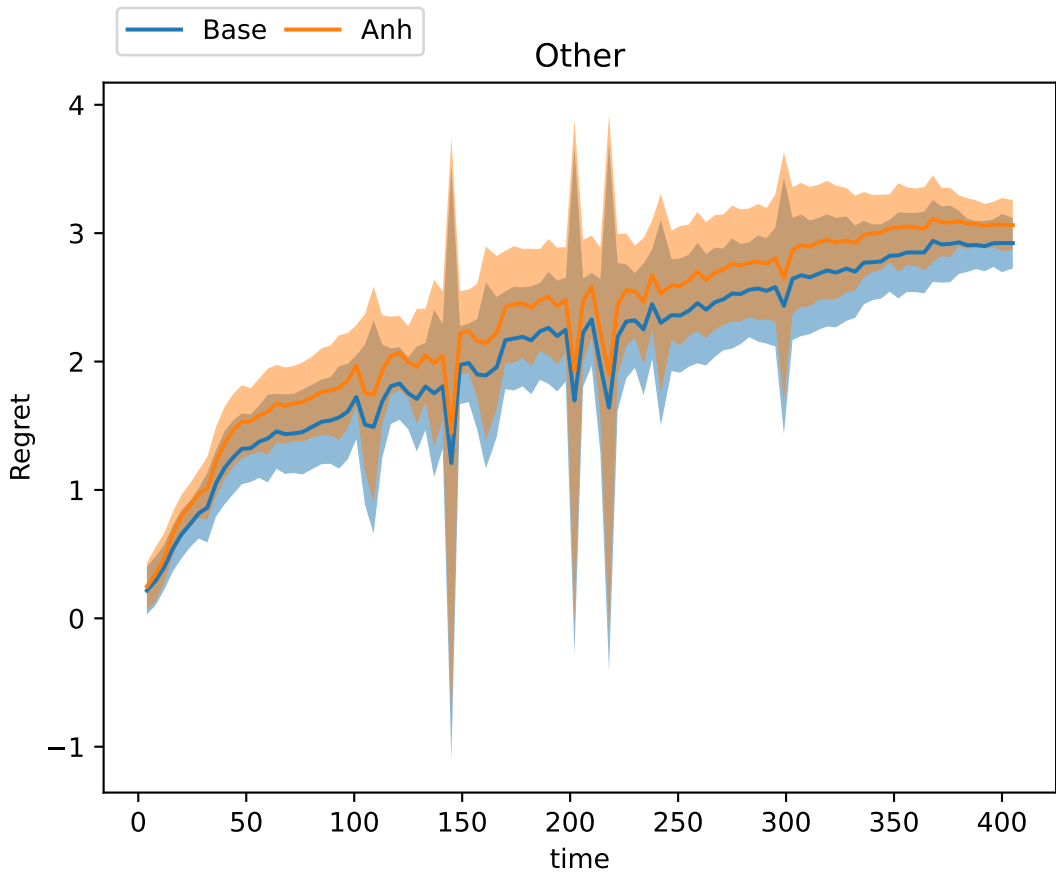

Supplement: supplementary_material [file attachment]

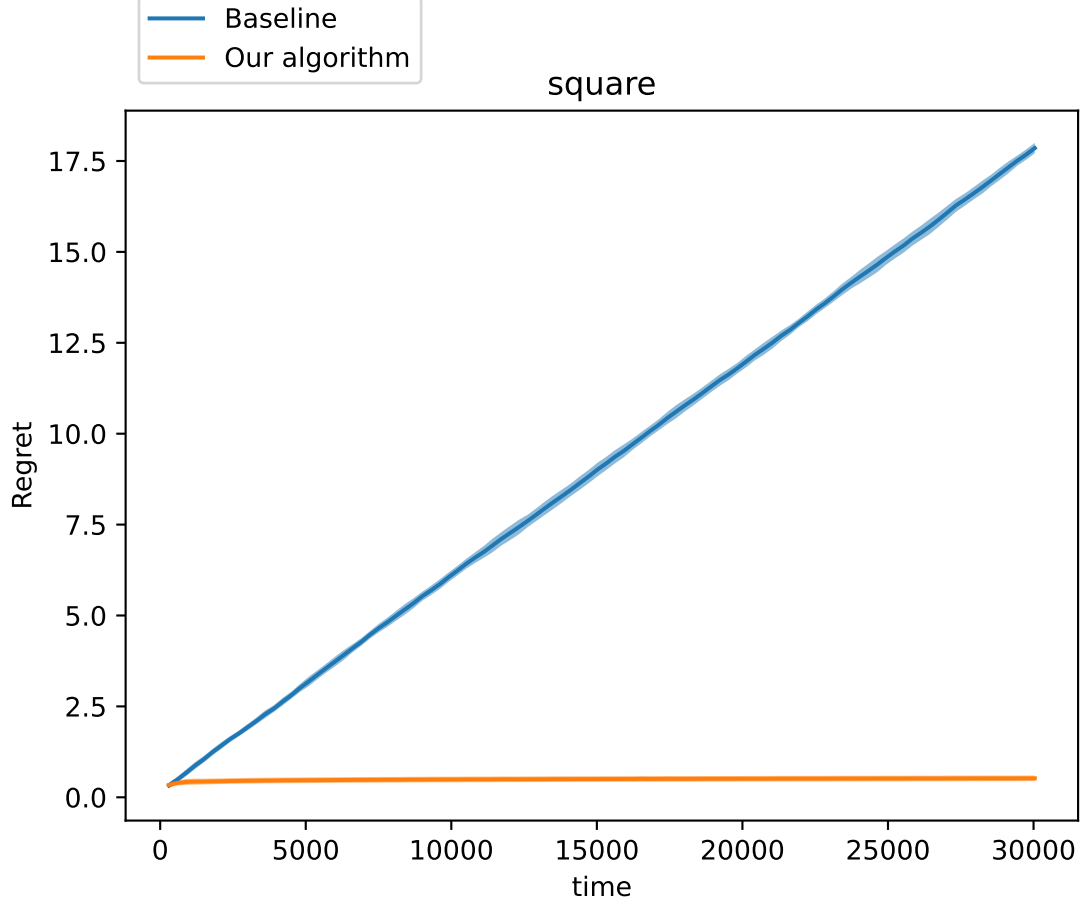

Supplement: supplementary_material [file attachment]

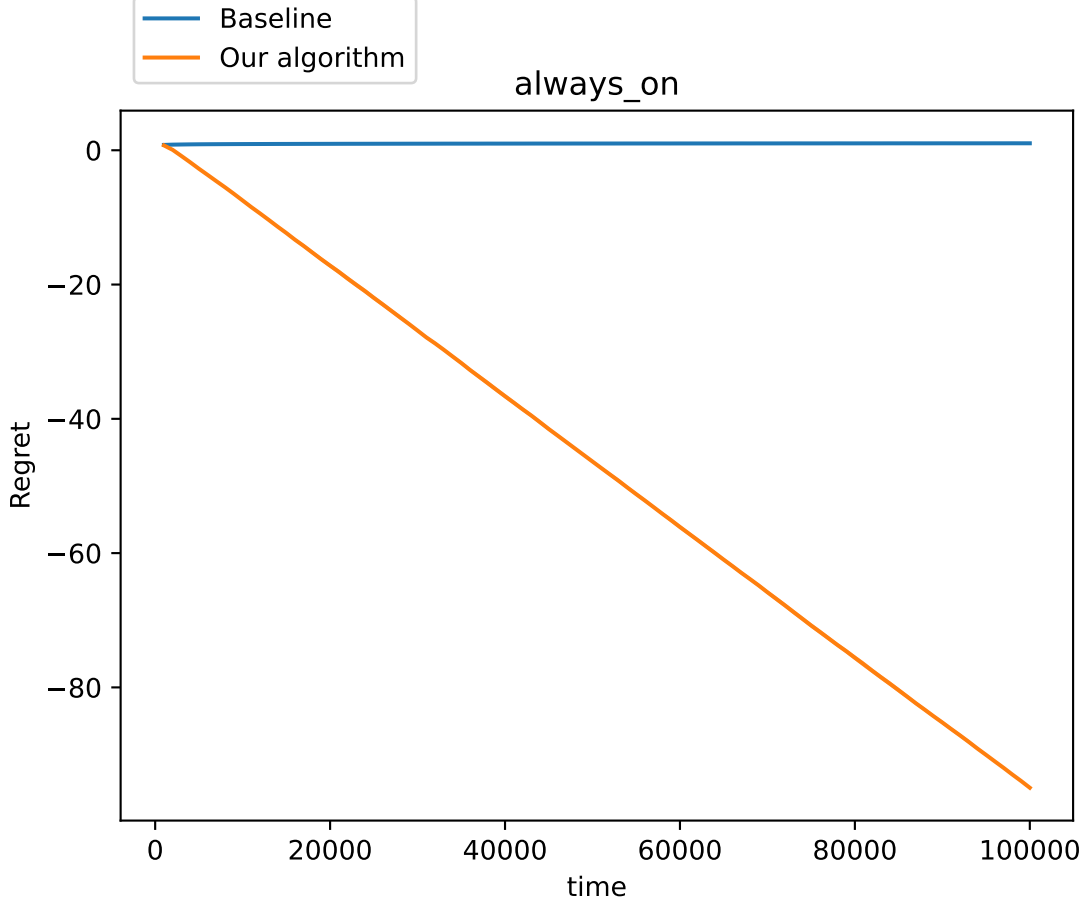

Supplement: supplementary_material [file attachment]

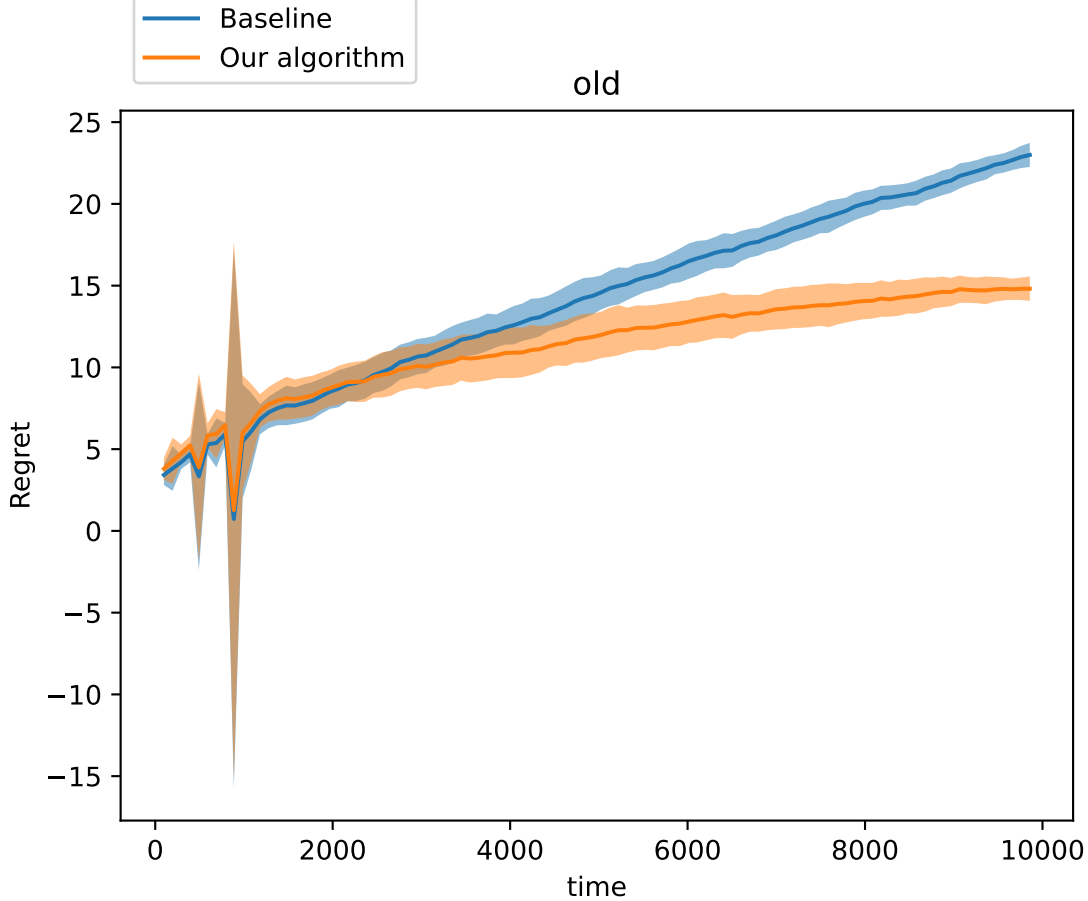

Supplement: supplementary_material [file attachment]

always\_on

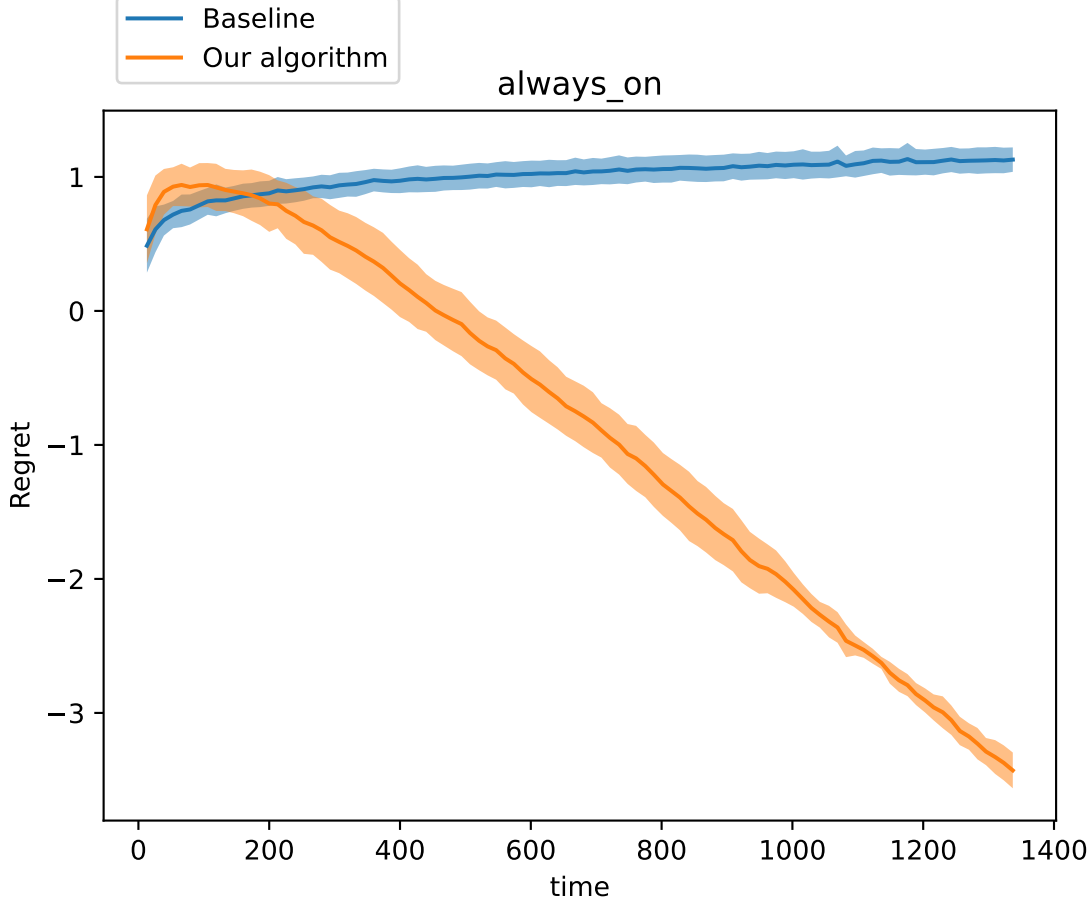

Supplement: supplementary_material [file attachment]

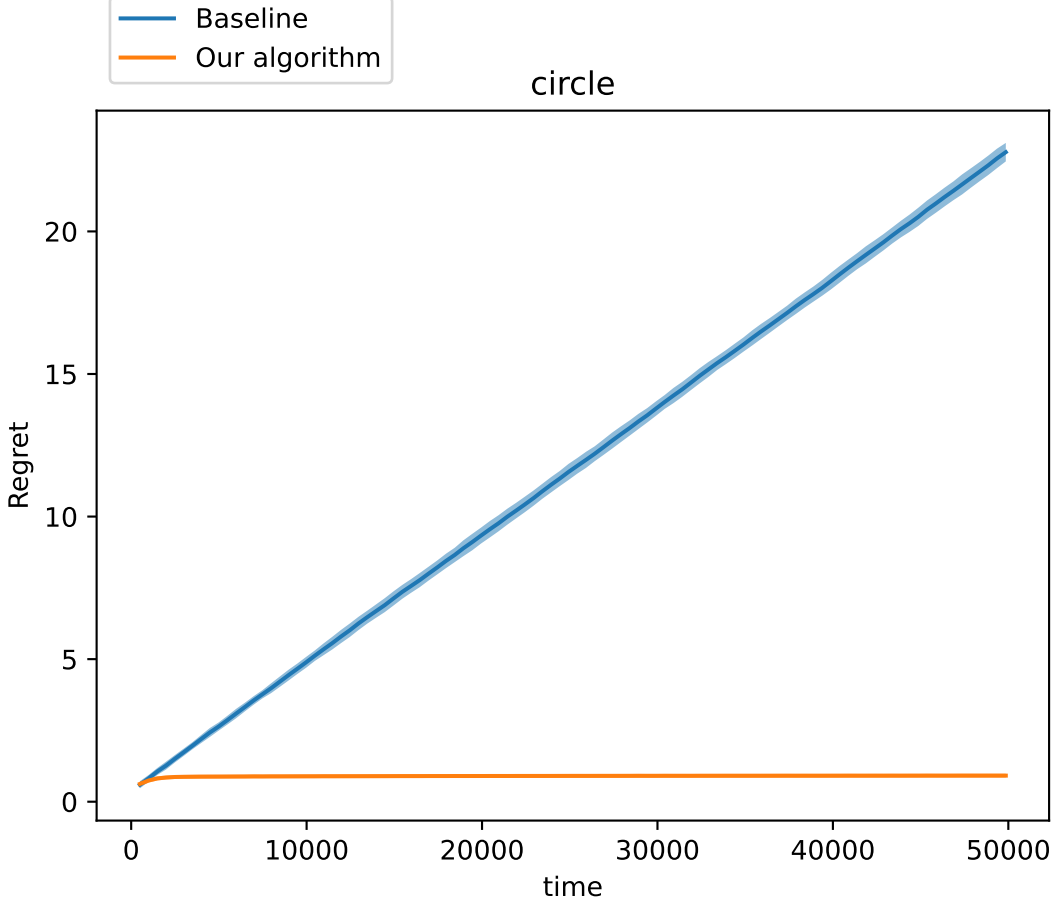

Supplement: supplementary_material [file attachment]

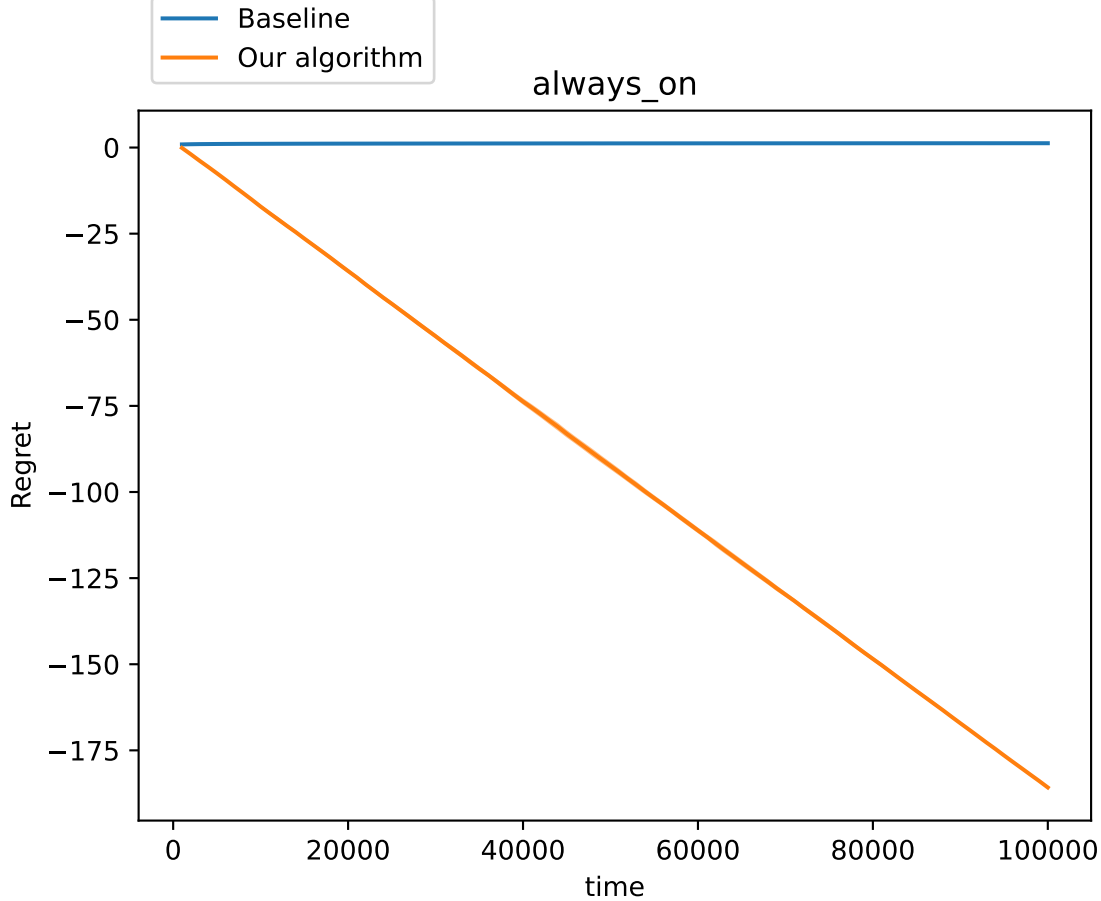

Supplement: supplementary_material [file attachment]

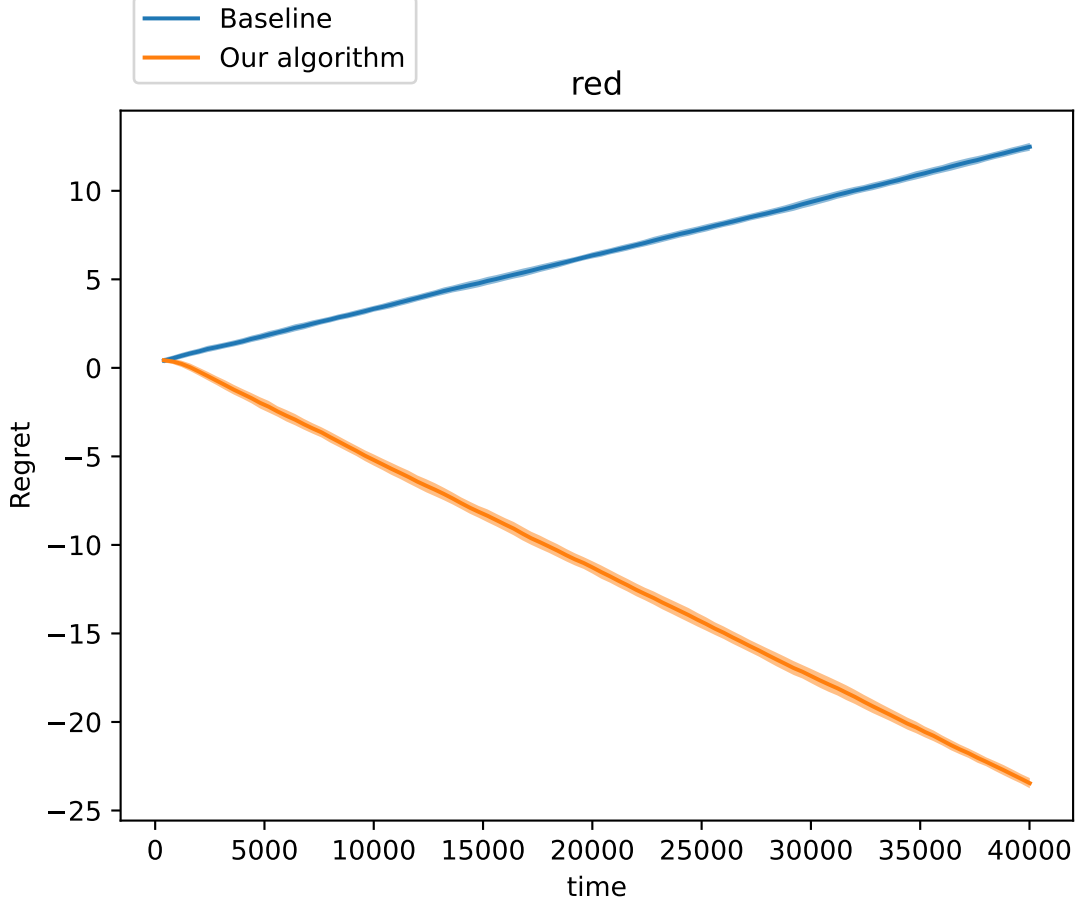

Supplement: supplementary_material [file attachment]

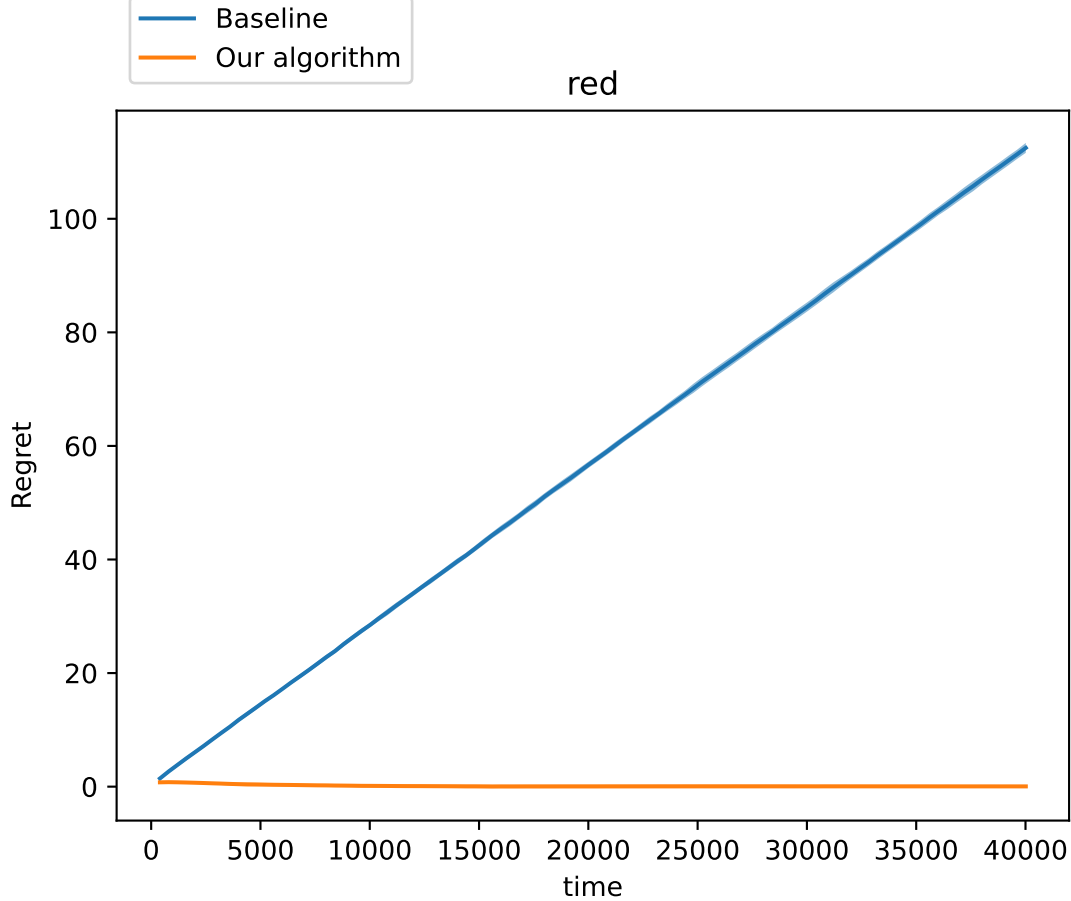

Supplement: supplementary_material [file attachment]

always\_on

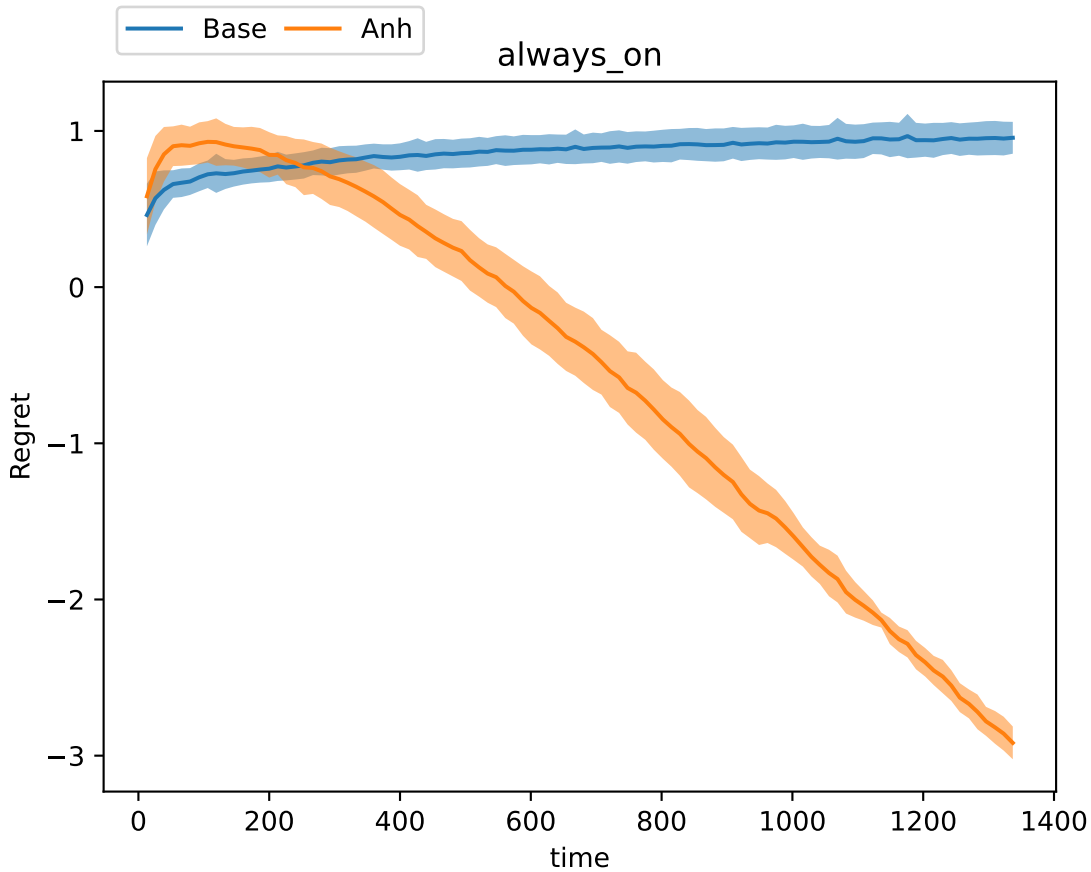

Supplement: supplementary_material [file attachment]

Demographic groups: age(young, middle, old), sex(male, female)

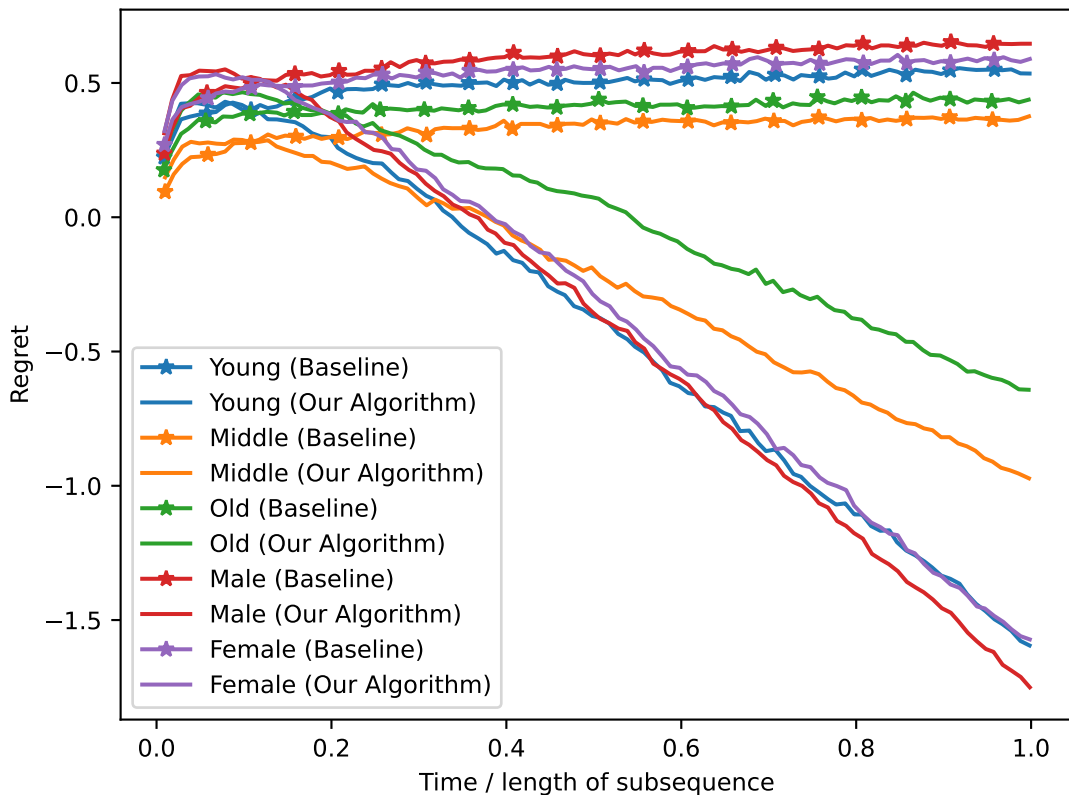

Supplement: supplementary_material [file attachment]

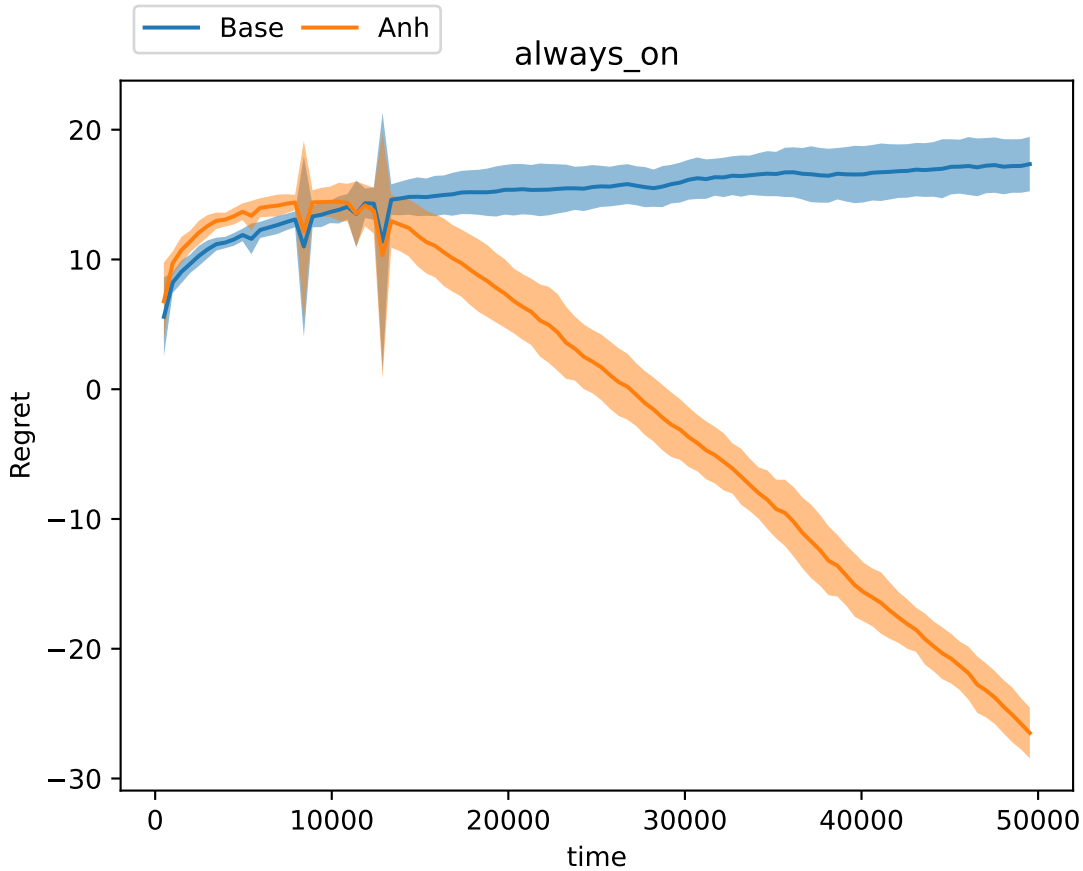

Supplement: supplementary_material [file attachment]

triangle

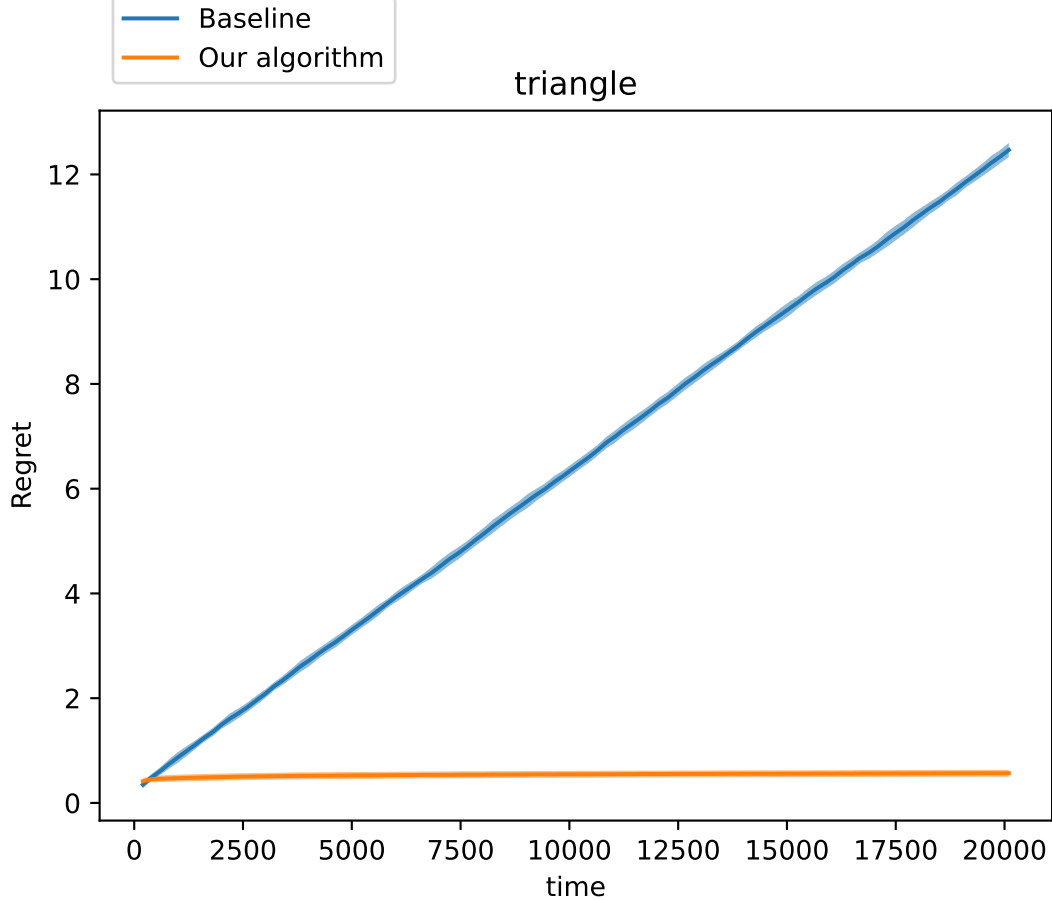

Supplement: supplementary_material [file attachment]

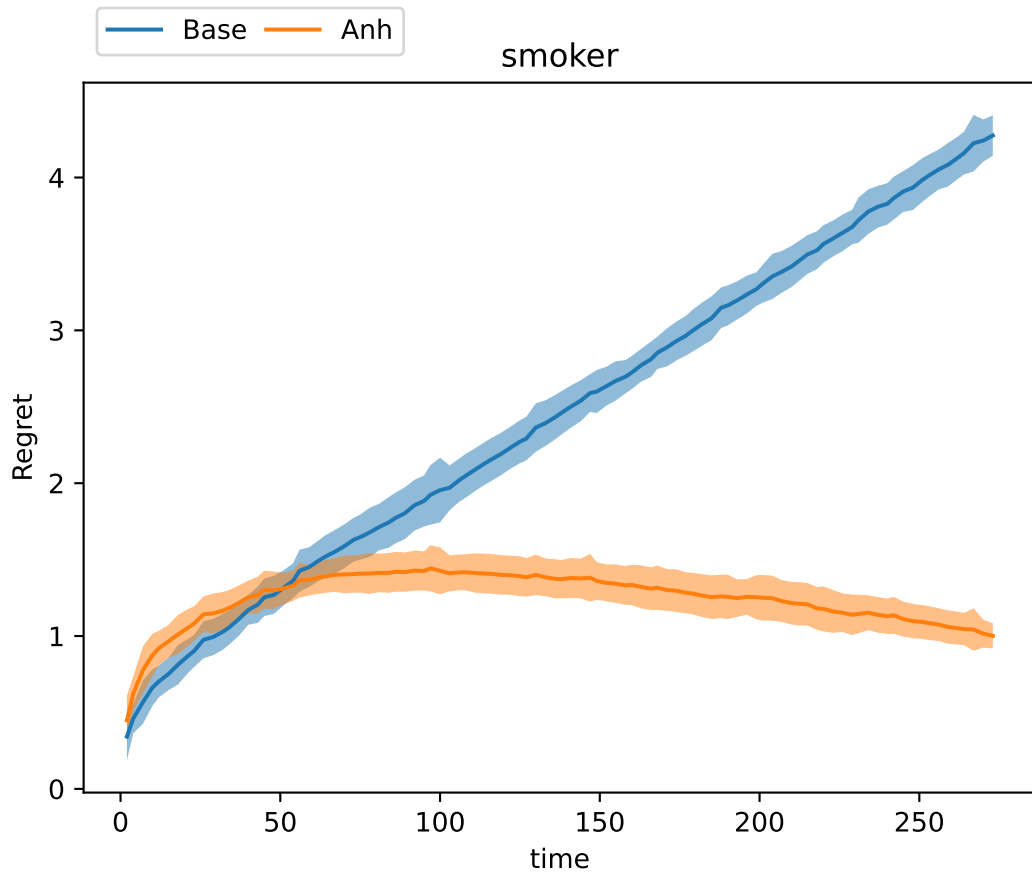

Supplement: supplementary_material [file attachment]

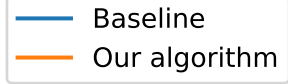

red

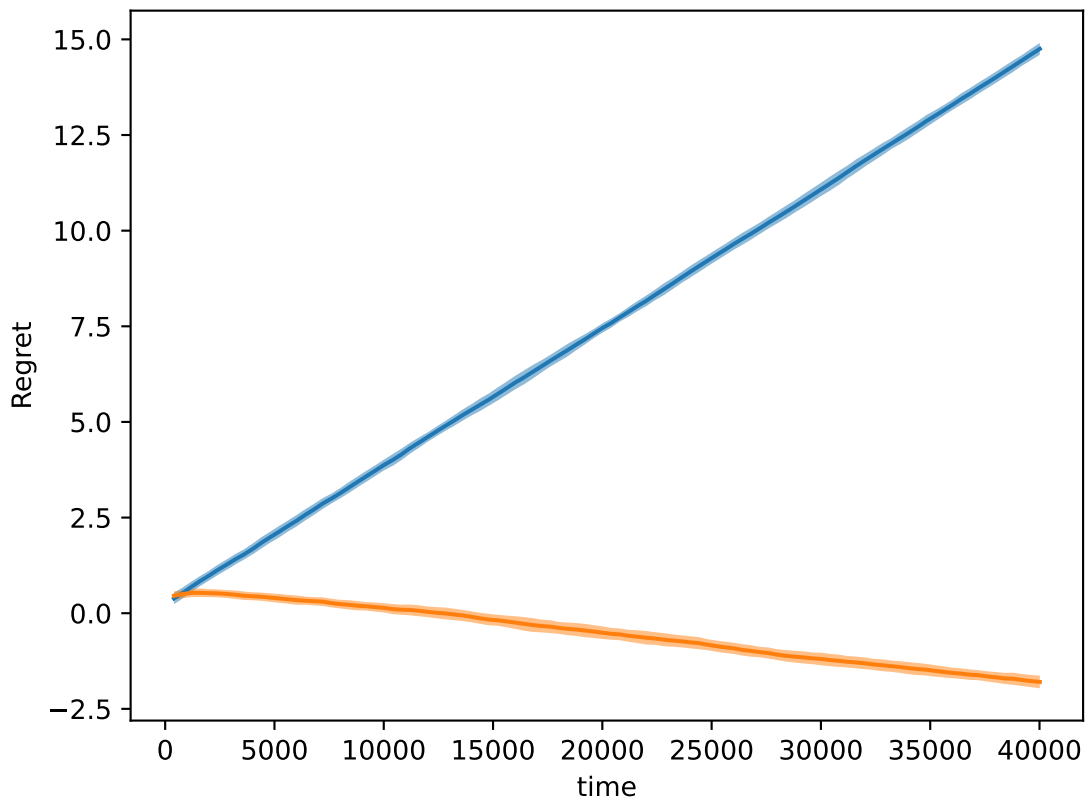

Supplement: supplementary_material [file attachment]

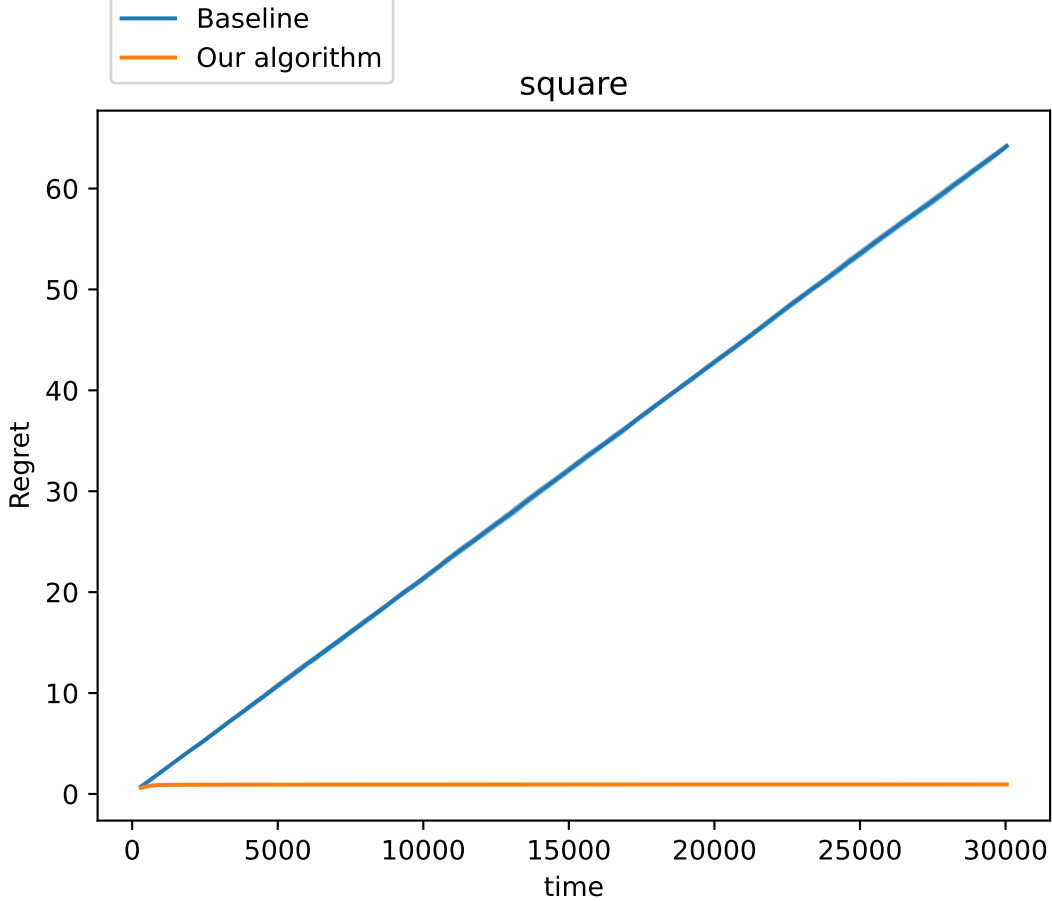

Supplement: supplementary_material [file attachment]

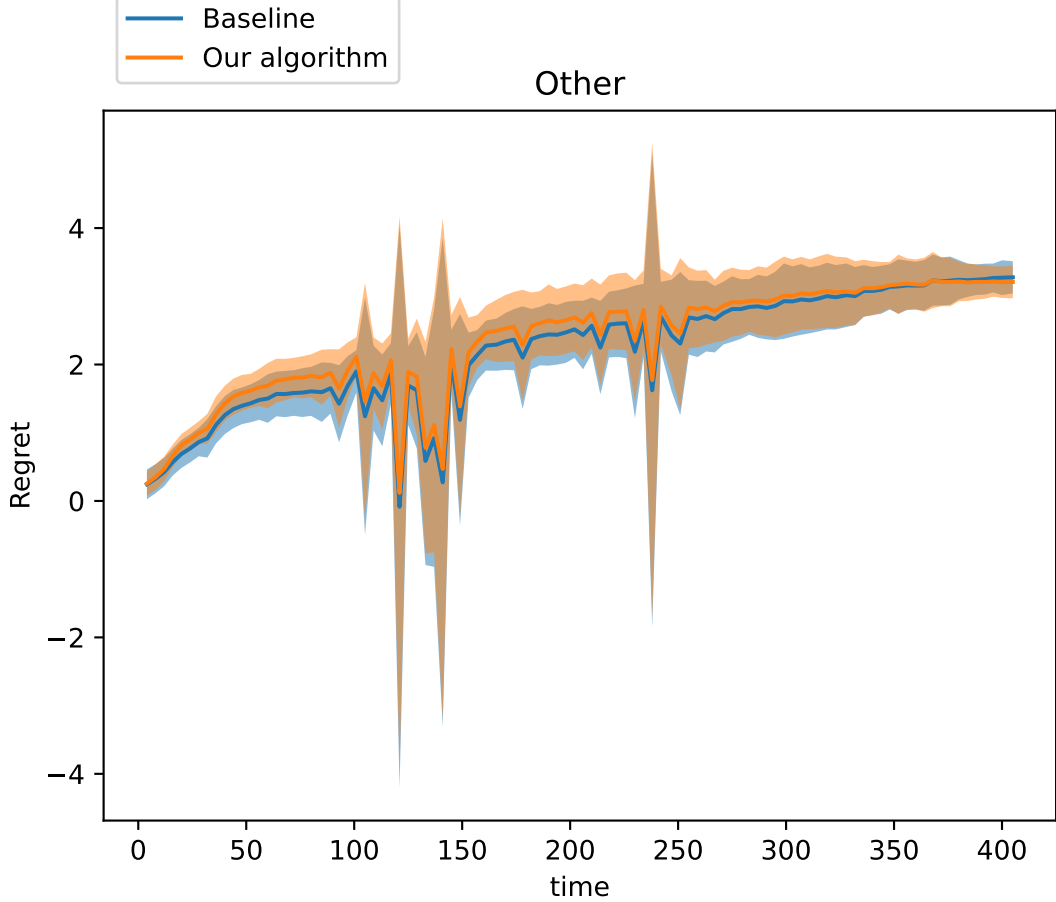

Supplement: supplementary_material [file attachment]

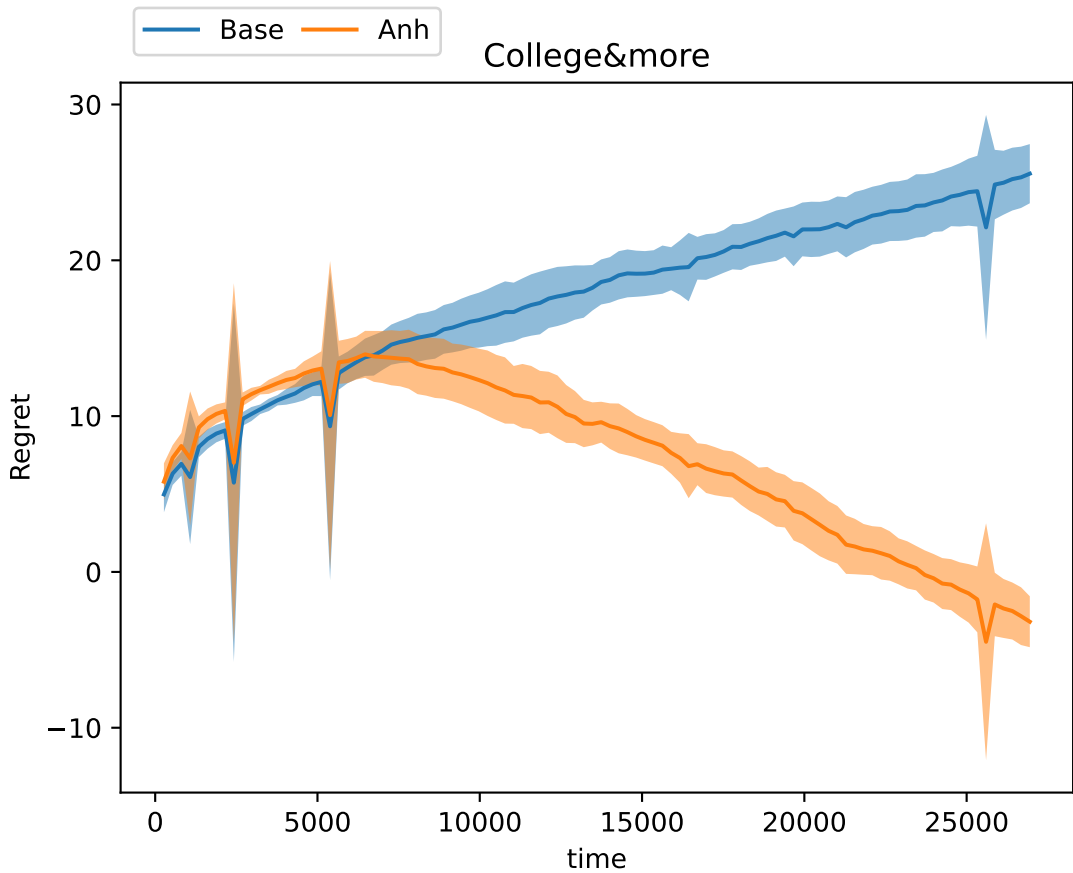

Supplement: supplementary_material [file attachment]

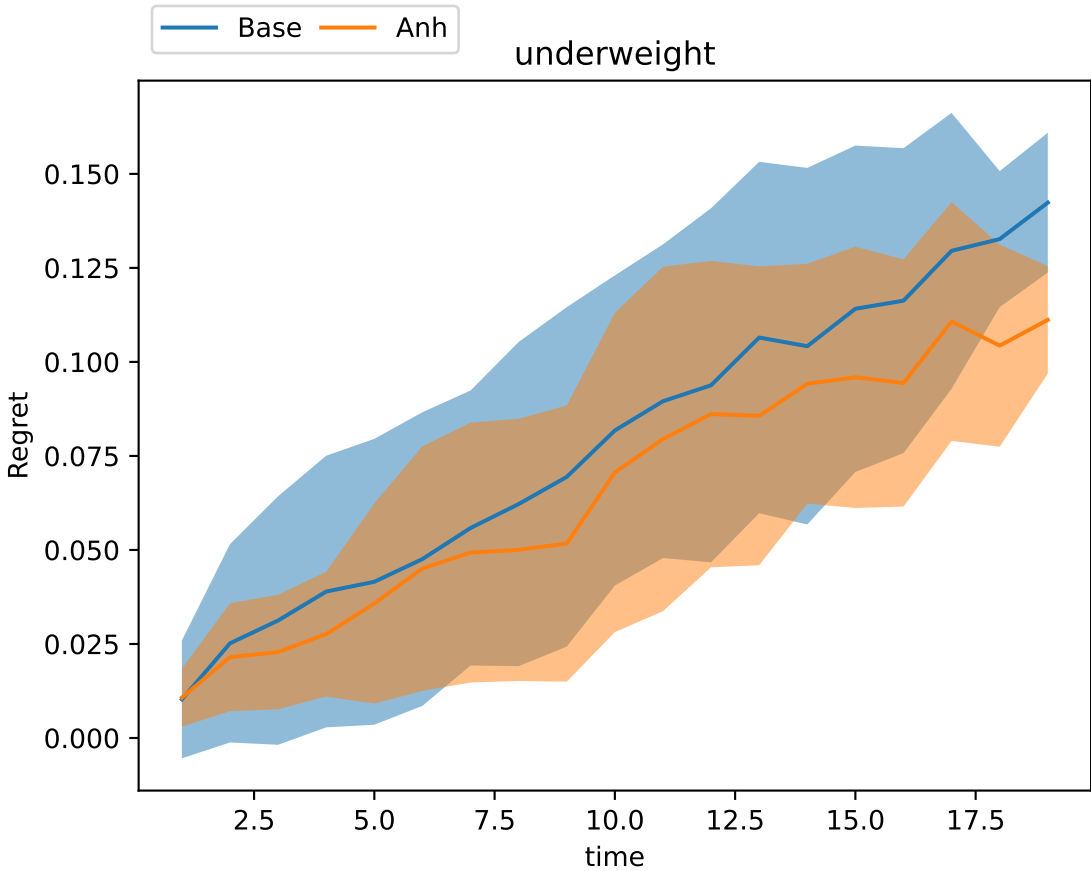

Supplement: supplementary_material [file attachment]

Groups: smoker, non-smoker

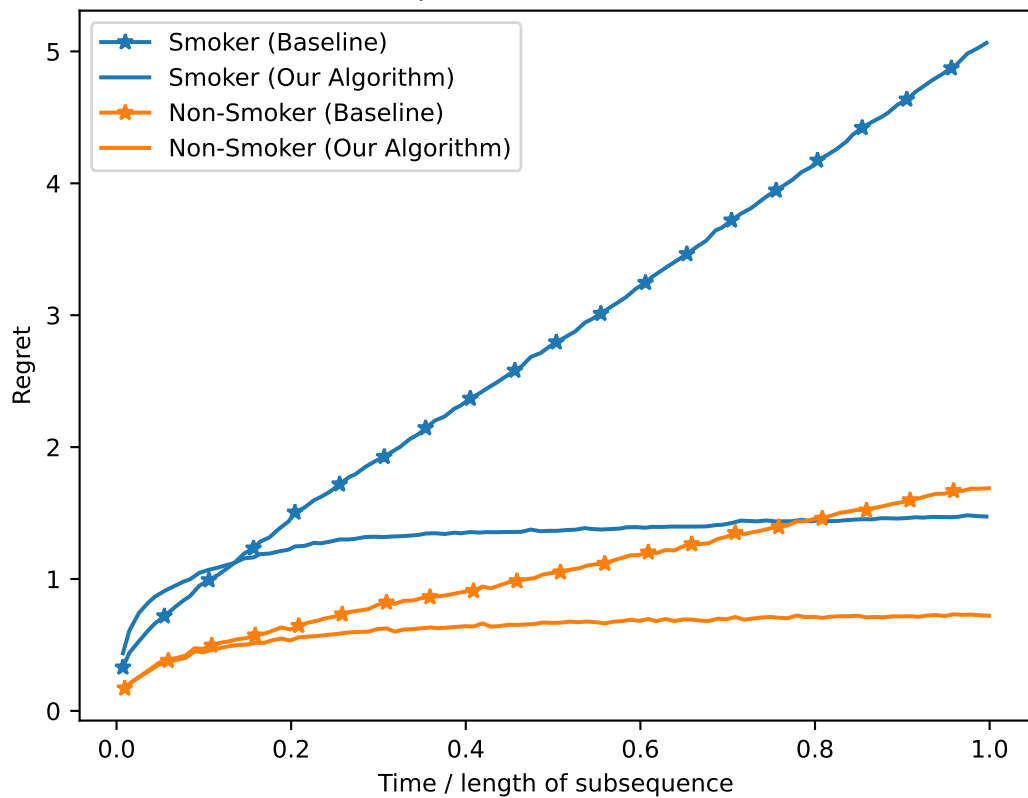

Supplement: supplementary_material [file attachment]

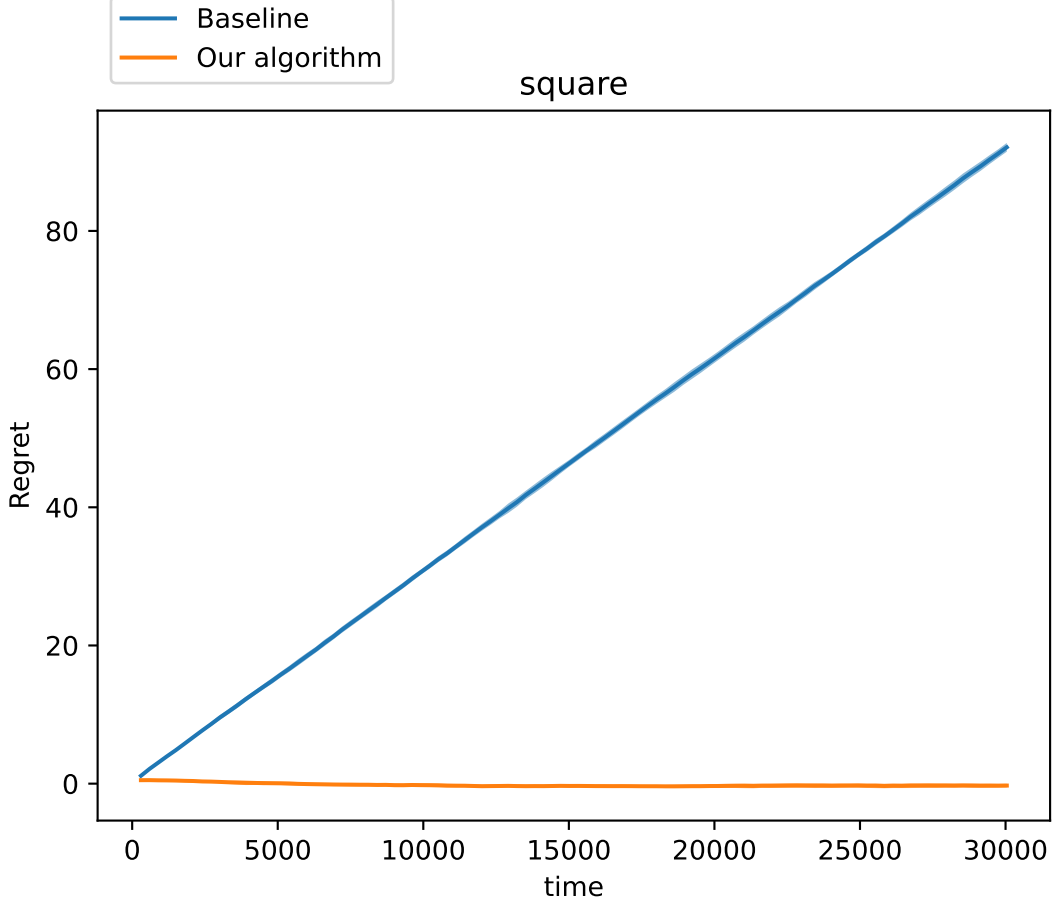

Supplement: supplementary_material [file attachment]
